# Supplementary material
Source: publisher figshare collection journal article supplement (https://tandf.figshare.com/ndownloader/files/19124951)
Supplement: Supplementary file 1 [file 19124951]

**Supporting information**

Synthesis, anticancer and antimicrobial evaluation of new pyridyl and thiazolyl clubbed hydrazone scaffolds

Mahesh B. Muluka,Akash S. Ubalea,Sambhaji T. Dhumalb,Naziya N. M. A. Rehmanc,Prashant P. Dixitc, Kiran K. Kharatd, Prafulla B. Choudharie, and Kishan P. Havala

aDepartment of Chemistry, Dr. Babasaheb Ambedkar Marathwada University SubCampus, Osmanabad, MS, India; bDepartment of Chemistry, Dr. Babasaheb Ambedkar Marathwada University, Aurangabad, MS, India; cDepartment of Microbiology, Dr. Babasaheb Ambedkar Marathwada University SubCampus, Osmanabad, MS, India; dDepartment of Biotechnology, Deogiri College, Aurangabad, MS, India; eDepartment of Pharmaceutical Chemistry, Bharati Vidyapeeth College of Pharmacy, Kolhapur, MS, India

Contact: Kishan P. Haval; Email: [havalkp@gmail.com](mailto:havalkp@gmail.com)

**Experimental**

The commercially available laboratory grade chemicals were used. The IR spectra were recorded on Brucker FT-IR spectrometer. The 1H and 13C NMR spectra were recorded on Brucker DRX-400 NMR spectrometer. The trimethylsilane (TMS) was used as an internal standard. The coupling constants (*J*) are reported in hertz (Hz).

***Synthesis of ethyl 2-(2-propylpyridin-4-yl)thiazole-5-carboxylate (3)***

A mixture of 2-propylpyridine-4-carbothioamide (**1**) (1.0 mmol) and ethyl bromopyruvate (**2**) (1.3 mmol) was refluxed in ethanol. The progress of the reaction was monitored by TLC. After completion of the reaction, the ethanol was evaporated under vacuum. The residue obtained was dissolved in ethyl acetate (50 mL) and neutralized by ammonia solution. The organic layer was washed with brine and dried over anhydrous sodium sulphate. The ethyl acetate was evaporated under vacuum and obtained product was purified by column chromatography using ethyl acetate and petroleum ether to furnish ethyl 2-(2-propylpyridin-4-yl)thiazole-5-carboxylate (**3**).

Yield: 85%; Thick oil; 1H NMR (400 MHz, CDCl3) *δ* = 1.00 (t, *J* = 7.3 Hz, 3H, CH3), 1.30 (m, 2H, CH2), 1.44 (t, *J* = 7.1 Hz, 3H, CH3), 2.97 (t, *J* = 7.4 Hz, 2H, CH2), 4.47 (q, *J* = 8 Hz, 2H, OCH2), 7.86 (d, *J* = 3.7 Hz, 1H, Ar-H), 7.96 (s, 1H, Ar-H), 8.34 (s, 1H, thiazolyl-H), 8.75 (d, *J* = 4.2 Hz, 1H, Ar-H).

***Synthesis of 2-(2-propylpyridin-4-yl)thiazole-5-carbohydrazide (4)***

Ethyl 2-(2-propylpyridin-4-yl)thiazole-5-carboxylate (**3**) (1.0 mmol) and excess of hydrazine hydrate (3.0 mmol) were refluxed in ethanol. The progress of the reaction was monitored by TLC. After completion of the reaction, the ethanol was removed under reduced pressure. The obtained residue was poured in ice-cold water. The solid obtained was filtered, washed with water and crystallized from ethanol to furnish 2-(2-propylpyridin-4-yl)thiazole-5-carbohydrazide (**4**).

Yield: 76%; M. P.: 157-159oC; IR(Neat) *ν* cm-1: 3499, 3247, 3054, 2954, 2892, 1665, 1601, 1534, 1473, 1264, 1176, 1098, 984, 927, 839, 793, 708; 1H NMR (400 MHz, CDCl3) *δ* = 1.00 (t, *J* = 7.4 Hz, 3H, CH3), 1.81 (m, 2H, CH2), 2.85 (t, *J* = 7.6 Hz, 2H, CH2), 4.14 (s, 2H, NH2), 7.59 (dd, *J* = 5.2 & 1.6 Hz, 1H, Ar-H), 7.65 (s, 1H, Ar-H), 8.23 (s, 1H, thiazolyl-H), 8.54 (bs, 1H, NH), 8.64 (d, *J* = 5.1 Hz, 1H, Ar-H); 13C NMR (100 MHz, CDCl3) *δ* = 13.87, 23.06, 40.37, 117.75, 119.28, 124.59, 139.56, 149.54, 150.26, 161.43, 163.79, 166.23.

***Synthesis of substituted (E)-N'-benzylidene-2-(2-propylpyridin-4-yl)thiazole-5-carbohydrazides (6a-k)***

The substituted aromatic aldehydes (**5a-k**) (1.0 mmol) and 2-(2-propylpyridin-4-yl)thiazole-5-carbohydrazide(**4**) (1.0 mmol) was dissolved in diisopropylethylammonium acetate (DIPEAc) (5 ml) and stirred at room temperature for 30 min. After completion of reaction, the reaction mixture was poured on cold water. The solid obtained was filtered and washed with cold water. The products obtained were crystallized from ethanol to furnish corresponding substituted (*E*)-*N*'-benzylidene-2-(2-propylpyridin-4-yl)thiazole-5-carbohydrazides (**6a-k**)with 80-90% yields

***(E)-N'-(3,5-Dichloro-2-hydroxybenzylidene)-2-(2-propylpyridin-4-yl)thiazole-5-carbohydrazide (6a*)**

Yield: 85%; M. P.: 220-222oC; **IR** (Neat) *ν* cm-1: 3424, 3116, 2907, 2840, 1682, 1600, 1534, 1444, 1347, 1285, 1222, 1177, 994, 849, 796, 717; **1H NMR** (400 MHz, CDCl3) *δ* = 1.08 (t, *J* = 6.7 Hz, 3H, CH3), 1.90 (m, 2H, CH2), 2.93 (t, *J* = 6.7 Hz, 2H, CH2), 7.39-7.38 (m, 1H, Ar-H), 7.44 (s, 1H, Ar-H), 7.77 (d, *J* = 12.9 Hz, 2H, Ar-H), 8.45 (s, 1H, thiazolyl-H), 8.69 (s, 2H, Ar-H), 11.23 (s, 1H, Ar-OH), 12.00 (s, 1H, amido-NH); **13C NMR** (100 MHz, CDCl3 + DMSO-*d*6) *δ* = 13.87, 23.06, 29.62, 119.55, 122.62, 123.73, 126.69, 128.43, 131.28, 139.33, 148.88, 149.31, 150.17, 152.94, 156.59, 166.33; **HRMS** (ESI)+ calcd. for C19H16Cl2N4O2S [M+H]+: 435.0371 and found 435.0443.

***(E)-N'-(3,5-Dichlorobenzylidene)-2-(2-propylpyridin-4-yl)thiazole-5-carbohydrazide (6b)***

Yield: 80%; M. P.: 139-141oC; **IR** (Neat) *ν* cm-1: 3273, 3171, 3029, 2912, 2892, 1663, 1595, 1461, 1405, 1352, 1222, 1117, 1064, 1024, 961, 798, 699; **1H NMR** (400 MHz, CDCl3) *δ* = 1.03 (t, *J* = 7.4 Hz, 3H, CH3), 2.22-1.70 (m, 2H, CH2), 2.89 (d, *J* = 7.4 Hz, 2H, CH2), 7.51 (d, *J* = 8.3 Hz, 1H, Ar-H), 7.67-7.63 (m, 2H, Ar-H), 7.68 (s, 1H, Ar-H), 7.95 (d, *J* = 1.9 Hz, 1H, Ar-H), 8.37 (s, 1H, Ar-H), 8.40 (s, 1H, thiazolyl-H), 8.68 (d, *J* = 5.1 Hz, 1H, Ar-H), 10.42 (s, 1H, amido-NH); **13C NMR** (100 MHz, CDCl3) *δ* = 14.04, 23.24, 40.58, 117.95, 119.50, 124.20, 126.68, 128.46, 139.48, 139.48, 139.80, 146.20, 148.93, 149.64, 150.52, 157.06, 164.10, 166.69; **HRMS** (ESI)+ calcd. for C19H16Cl2N4OS [M+H]+: 419.0422 and found 419.0501.

***(E)-N'-(4-Chlorobenzylidene)-2-(2-propylpyridin-4-yl)thiazole-5-carbohydrazide (6c)***

Yield: 82%; M. P.: 157-159oC; **IR** (Neat) *ν* cm-1: 3239, 3047, 2965, 2918, 2856, 1665, 1596, 1531, 1484, 1406, 1354, 1270, 1225, 1195, 1055, 975, 900, 833, 794, 707, 657; **1H NMR** (400 MHz, CDCl3) *δ* = 1.03 (t, *J* = 7.4 Hz, 3H, CH3), 1.91-1.79 (m, 2H, CH2), 2.89 (t, *J* = 7.4 Hz, 2H, CH2), 7.41 (d, *J* = 8.5 Hz, 2H, Ar-H), 7.64 (dd, *J* = 5.2 & 1.7 Hz, 1H, Ar-H), 7.68 (s, 1H, Ar-H), 7.77 (d, *J* = 8.5 Hz, 2H, Ar-H), 8.37 (s, 1H, Ar-H), 8.39 (s, 1H, thiazolyl-H), 8.68 (d, *J* = 5.1 Hz, 1H, Ar-H), 10.38 (s, 1H, amido-NH); **13C NMR** (100 MHz, CDCl3) *δ* = 13.90, 23.11, 40.42, 117.83, 119.37, 126.09, 129.00, 129.09, 132.02, 136.68, 139.45, 147.64, 149.82, 150.33, 156.73, 163.90, 166.33; **HRMS** (ESI)+ calcd. for C19H17ClN4OS [M+H]+: 385.0812 and found 385.0888.

***(E)-N'-(4-Bromobenzylidene)-2-(2-propylpyridin-4-yl)thiazole-5-carbohydrazide (6d)***

Yield: 90%; M. P.: 178-180oC; **IR** (Neat) *ν* cm-1: 3280, 3015, 2905, 2878, 2755, 1661, 1591, 1490, 1470, 1366, 1334, 1280, 1217, 1177, 1056, 970, 897, 826; **1H NMR** (400 MHz, CDCl3) *δ* = 1.03 (t, *J* = 7.4 Hz, 3H, CH3), 1.89-1.79 (m, 2H, CH2), 2.89 (t, *J* = 7.4 Hz, 2H, CH2), 7.57 (d, *J* = 8.5 Hz, 2H, Ar-H), 7.64 (dd, *J* = 5.2 & 1.7 Hz, 1H, Ar-H), 7.68 (s, 1H, Ar-H), 7.70 (d, *J* = 8.5 Hz, 2H, Ar-H), 8.36 (s, 1H, Ar-H), 8.40 (s, 1H, thiazolyl-H), 8.68 (d, *J* = 5.7 Hz, 1H, Ar-H), 10.39 (s, 1H, amido-NH); **13C NMR** (100 MHz, CDCl3) *δ* = 14.05, 23.26, 40.56, 117.97, 119.51, 125.23, 126.27, 129.34, 132.16, 132.56, 139.58, 147.83, 149.92, 150.47, 156.87, 164.03, 166.46.

***(E)-N'-(3-Nitrobenzylidene)-2-(2-propylpyridin-4-yl)thiazole-5-carbohydrazide (6e)***

Yield: 88%; M. P.: 174-176oC; **IR** (Neat) *ν* cm-1: 3185, 3118, 3071, 2914, 2850, 1656, 1596, 1511, 1459, 1339, 1298, 1224, 1101, 1056, 1008, 946, 876, 833, 792, 738, 656; **1H NMR** (400 MHz, CDCl3) *δ* = 1.01 (t, *J* = 7.4 Hz, 3H, CH3), 1.87-1.77 (m, 2H, CH2), 2.86 (t, *J* = 7.4 Hz, 2H, CH2), 7.58 (d, *J* = 8.0 Hz, 1H, Ar-H), 7.62 (dd, *J* = 5.3 & 1.7 Hz, 1H, Ar-H), 7.67 (s, 1H, Ar-H), 8.27-8.17 (m, 2H, Ar-H), 8.40 (s, 1H, thiazolyl-H), 8.55 (s, 1H, Ar-H), 8.58 (s, 1H, Ar-H), 8.65 (d, *J* = 5.0 Hz, 1H, Ar-H), 10.61 (s, 1H, amido-NH); **13C NMR** (100 MHz, CDCl3) *δ* = 13.89, 23.09, 40.41, 117.81, 119.35, 122.61, 124.93, 126.43, 129.82, 132.89, 135.54, 139.36, 146.29, 148.58, 149.57, 150.33, 156.96, 163.92, 166.46.

***(E)-N'-(2-Nitrobenzylidene)-2-(2-propylpyridin-4-yl)thiazole-5-carbohydrazide (6f)***

Yield: 90%; M. P.: 116-118oC; **IR** (Neat) *ν* cm-1: 3215, 3127, 3052, 3018, 2870, 1663, 1587, 1503, 1456, 1342, 1293, 1219, 1100, 1046, 1012, 942, 871, 831, 790, 733, 653; **1H NMR** (400 MHz, CDCl3) *δ* = 1.02 (t, *J* = 7.3 Hz, 3H, CH3), 1.85 (m, 2H, CH2), 2.89 (t, *J* = 7.3 Hz, 2H, CH2), 7.58 (t, *J* = 8.4 Hz, 1H, Ar-H), 7.73-7.65 (m, 3H, Ar-H), 8.08 (d, *J* = 7.4 Hz, 1H, Ar-H), 8.38 (dd, *J* = 7.8 & 0.8 Hz, 1H, Ar-H), 8.43 (s, 1H, thiazolyl-H), 8.68 (d, *J* = 5.1 Hz, 1H, Ar-H), 8.91 (s, 1H, Ar-H), 10.67 (s, 1H, amido-NH); **13C NMR** (100 MHz, CDCl3) *δ* = 13.90, 23.15, 40.40, 117.92, 119.37, 124.82, 126.51, 128.62, 129.44, 130.76, 133.73, 139.37, 143.87, 148.13, 149.52, 150.42, 150.33, 156.89, 163.97, 166.53; **HRMS** (ESI)+ calcd. for C19H17N5O3S [M+H]+: 396.1052 and found 396.1131.

***(E)-N'-(3-Chlorobenzylidene)-2-(2-propylpyridin-4-yl)thiazole-5-carbohydrazide (6g)***

Yield: 85%; M. P.: 164-166oC; **IR** (Neat) *ν* cm-1: 3154, 2940, 2847, 1677, 1596, 1521, 1456, 1379, 1261, 1119, 1070, 1028, 924, 855, 796, 691; **1H NMR** (400 MHz, CDCl3) *δ* = 1.03 (t, *J* = 7.4 Hz, 3H, CH3), 1.85 (m, 2H, CH2), 2.88 (t, *J* = 7.4 Hz, 2H, CH2), 7.41-7.33 (m, 2H, Ar-H), 7.64 (dd, *J* = 5.2 & 1.6 Hz, 1H, Ar-H), 7.70-7.65 (m, 2H, Ar-H), 7.86 (t, *J* = 2.8 Hz, 1H, Ar-H), 8.37 (s, 1H, Ar-H), 8.40 (s, 1H, thiazolyl-H), 8.68 (d, *J* = 5.1 Hz, 1H, Ar-H), 10.42 (s, 1H, amido-NH); **13C NMR** (100 MHz, CDCl3) *δ* = 14.04, 23.24, 40.56, 117.97, 119.50, 126.19, 126.31, 127.56, 130.12, 130.76, 135.08, 135.50, 147.54, 149.92, 150.46, 156.91, 164.03, 166.47.

***(E)-N'-(2-Bromobenzylidene)-2-(2-propylpyridin-4-yl)thiazole-5-carbohydrazide (6h)***

Yield: 87%; M. P.: 197-199oC; **IR** (Neat) *ν* cm-1: 3193, 3027, 2917, 2877, 2744, 1651, 1593, 1478, 1465, 1359, 1338, 1285, 1207, 1187, 1062; **1H NMR** (400 MHz, CDCl3) *δ* = 1.03 (t, *J* = 7.4 Hz, 3H, CH3), 1.84 (m, 2H, CH2), 2.89 (t, *J* = 7.4 Hz, 2H, CH2), 7.57-7.55 (m, 1H, Ar-H), 7.59-7.57 (m, 1H, Ar-H), 7.64 (dd, *J* = 5.2 & 1.7 Hz, 1H, Ar-H), 7.69 (dd, *J* = 4.9 & 1.9 Hz, 2H, Ar-H), 7.73-7.70 (m, 1H, Ar-H), 8.36 (s, 1H, Ar-H), 8.40 (s, 1H, thiazolyl-H), 8.68 (d, *J* = 5.7 Hz, 1H, Ar-H), 10.38 (s, 1H, amido-NH); **13C NMR** (100 MHz, CDCl3) *δ* = 14.05, 23.27, 40.56, 117.97, 119.51, 125.23, 126.27, 129.34, 132.17, 132.57, 139.58, 147.83, 149.92, 150.47, 156.87, 164.03, 166.46; **HRMS** (ESI)+ calcd. for C19H17BrN4OS [M+H]+: 429.0306 and found 429.1327.

***(E)-N'-(2-Chlorobenzylidene)-2-(2-propylpyridin-4-yl)thiazole-5-carbohydrazide (6i)***

Yield: 89%; M. P.: 144-146oC; **IR** (Neat) *ν* cm-1: 3225, 2962, 2853, 1681, 1593, 1518, 1454, 1377, 1264, 1123, 1060, 1024, 929, 847; **1H NMR** (400 MHz, CDCl3) *δ* = 1.02 (t, *J* = 7.4 Hz, 3H, CH3), 1.84 (m, 2H, CH2), 2.89 (t, *J* = 7.4 Hz, 2H, CH2), 7.38-7.29 (m, 2H, Ar-H), 7.42-7.38 (m, 1H, Ar-H), 7.66 (dd, *J* = 5.1 & 1.7 Hz, 1H, Ar-H), 7.70 (s, 1H, Ar-H), 8.26 (dd, *J* = 7.4 & 2.1 Hz, 1H, Ar-H), 8.41 (s, 1H, thiazolyl-H), 8.68 (d, *J* = 5.1 Hz, 1H, Ar-H), 8.75 (s, 1H, Ar-H), 10.52 (s, 1H, amido-NH); **13C NMR** (100 MHz, CDCl3) *δ* = 14.02, 23.24, 40.50, 118.00, 119.53, 126.39, 127.28, 128.23, 129.88, 131.04, 131.70, 134.50, 145.36, 149.87, 150.44, 156.94, 163.99, 166.45.

***(E)-N'-(4-Nitrobenzylidene)-2-(2-propylpyridin-4-yl)thiazole-5-carbohydrazide (6j)***

Yield: 87%; M. P.: 176-178oC; **IR** (Neat) *ν* cm-1: 3193, 2987, 2933, 2848, 1651, 1573, 1508, 1455, 1341, 1294, 1231, 1117, 1051, 1016, 954, 832, 776; **1H NMR** (400 MHz, CDCl3) *δ* = 1.03 (t, *J* = 7.4 Hz, 3H, CH3), 1.85 (m, 2H, CH2), 2.89 (t, *J* = 7.4 Hz, 2H, CH2), 7.65 (dd, *J* = 5.1 & 1.7 Hz, 1H, Ar-H), 7.68 (s, 1H, Ar-H), 8.00 (d, *J* = 8.9 Hz, 2H, Ar-H), 8.29 (d, *J* = 8.8 Hz, 2H, Ar-H), 8.43 (s, 1H, thiazolyl-H), 8.56 (s, 1H, Ar-H), 8.69 (d, *J* = 5.1 Hz, 1H, Ar-H), 10.56 (s, 1H, amido-NH); **13C NMR** (100 MHz, CDCl3) *δ* = 14.03, 23.23, 40.56, 117.95, 119.84, 126.39, 126.90, 129.30, 130.92, 133.41, 133.76, 139.52, 146.45, 149.80, 150.47, 156.93, 164.04, 166.53.

***(E)-N'-(2,4-Dichlorobenzylidene)-2-(2-propylpyridin-4-yl)thiazole-5-carbohydrazide (6k)***

Yield: 82%; M. P.: 181-183oC; **IR** (Neat) *ν* cm-1: 3113, 2914, 2852, 1674, 1588, 1532, 1458, 1378, 1266, 1126, 1081, 1032, 929, 849, 795, 697; **1H NMR** (400 MHz, CDCl3) *δ* = 1.02 (t, *J* = 8.3 Hz, 3H, CH3), 1.85 (m, 2H, CH2), 2.88 (t, *J* = 8.3 Hz, 2H, CH2), 7.33-7.27 (m, 1H, Ar-H), 7.42 (t, *J* = 2.6 Hz, 1H, Ar-H), 7.89-7.58 (m, 2H, Ar-H), 8.20 (dd, *J* = 8.5 & 3.9 Hz, 1H, Ar-H), 8.41 (s, 1H, thiazolyl-H), 8.69-8.65 (m, 1H, Ar-H), 8.70 (s, 1H, Ar-H), 10.53 (s, 1H, amido-NH); **13C NMR** (100 MHz, CDCl3) *δ* = 13.91, 23.14, 40.42, 117.86, 119.40, 126.37, 127.73, 128.91, 129.60, 129.62, 134.80, 136.94, 139.40, 144.07, 149.63, 150.34, 156.78, 163.92, 166.43; **HRMS** (ESI)+ calcd. for C19H16Cl2N4OS [M+H]+: 419.0422 and found 419.0496.

***Antimicrobial activity***

All compounds were dissolved in DMSO at a concentration of 1mg/mL. Each bacterium and fungi were inoculated into sterile Mueller Hinton medium. It is kept at 37oC for 24 h for developing inoculums. Using sterile saline, the bacterial suspension was diluted to adjust the turbidity to the 0.5 McFarland standards. 200µL diluted suspension of each pathogen was inoculated on sterile Mueller Hinton agar plates. Wells were punched in the agar medium. Using Micropipette, 100µL of each compound solution was put in a separate well. 100µL of DMSO solution without any compound was also placed in a well to check its activity against the pathogenic culture. All petri dishes were incubated for 24 h at 37oC. A clear zone around the well was considered as positive results. After complete incubation, the antimicrobial activity of the synthesized compounds was measured. The zone of inhibition was measured and recorded in millimetre (mm).

***Docking analysis***

Docking analysis of the synthesized molecules was performed to predict the molecular mechanism of action. Biopredicta module of the V life MDS 4.5 was utilized for docking analysis. *Focal adhesion kinase* is a key enzyme involved in the regulation of cell adhesion, motility, and proliferation. Crystal structure of *focal adhesion kinase* (PDB ID: 2JKO) was utilized for docking analysis was downloaded from free protein database www.rcsb.org. The downloaded protein structure was refined via removal of the water molecule and the addition of hydrogen atoms to retain its native geometry. ADME of the synthesized derivatives was predicted from the free online server <http://www.swissadme.ch>. Compound **6a** was found to be interacting with FAK via the formation of hydrogen bond interaction with ARG426 and hydrophobic interactions with ALA450, LEU501 and THR503 (**Figure S50**). Compound **6b** was found to be the interacting formation of hydrogen bond interactions with ILE428, GLU430 and hydrophobic interactions with ASN551, GLY563, ASP564, LEU567 (**Figure S51**). The compound **6c** was found to be interacting with the formation of two hydrogen bond interactions with ILE428, GLU430 and hydrophobic interactions with ASN551, GLY563, ASP564, LEU567 (**Figure S52**). Compound **6d** showed significant hydrogen bond interactions with ILE428 (**Figure S53**). Compound **6e** showed multiple hydrophobic interactions with ARG550 (**Figure S54**). The compound **6f** showed hydrogen bond interaction with GLU430 and hydrophobic interactions with GLY429 and GLU430 (**Figure S55**). Compound **6g** showed four hydrogen bond interactions with ARG426, ILE428, THR503 and hydrophobic interactions with THR503, LEU504 (**Figure S56**). Compound **6h** showed the formation of three hydrophobic interactions with SER509 (**Figure S57**). Compound **6i** showed four hydrogen bond interactions with ARG426, ILE428, THR503 and hydrophobic interactions with THR503, LEU504 (**Figure S58**). Compound **6j** was found to be interacting via the formation of two hydrogen bond interactions with ILE428, GLU430 and hydrophobic interaction with ASN551, LEU553, GLY563, ASP564, LEU567 (**Figure S59**). Compound **6k** was found to be interacting via the formation of hydrophobic interaction with ASN551, LEU553, GLY563, ASP564, LEU567, GLY505, GLU506 (**Figure S60**).

**Figure S1**.1H NMR spectrum of compound **3**

**Figure S2**. IR spectrum of compound **4**

**Figure S3**.1H NMR spectrum of compound **4**

**
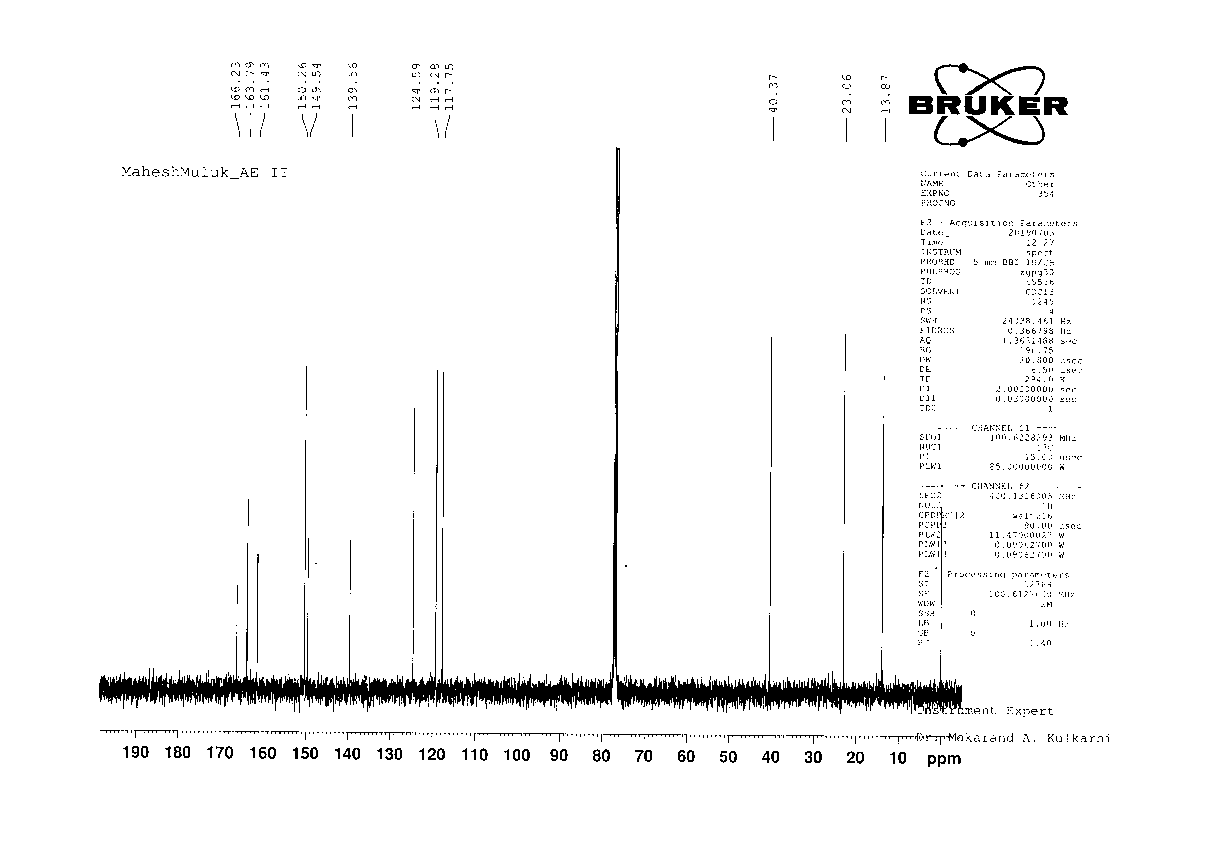
**

**Figure S4**.13C NMR spectrum of compound **4**

**

**

**Figure S5**. DEPT spectrum of compound **4**

**Figure S6**. IR spectrum of compound **6a**

**Figure S7**.1H NMR spectrum of compound **6a**

**

**

**Figure S8**.13C NMR spectrum of compound **6a**

**
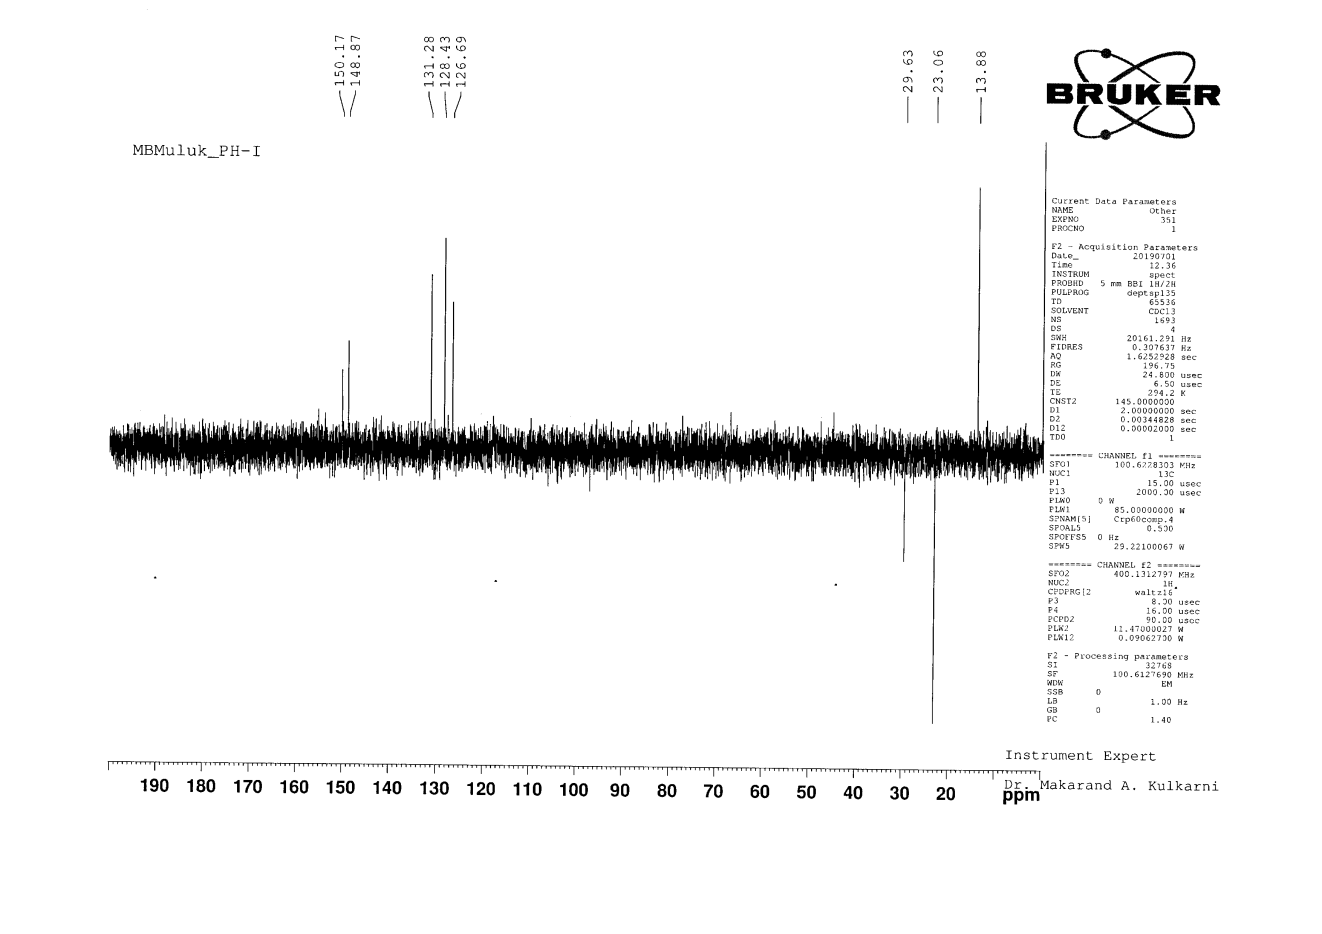
**

**Figure S9**.DEPT spectrum of compound **6a**

**
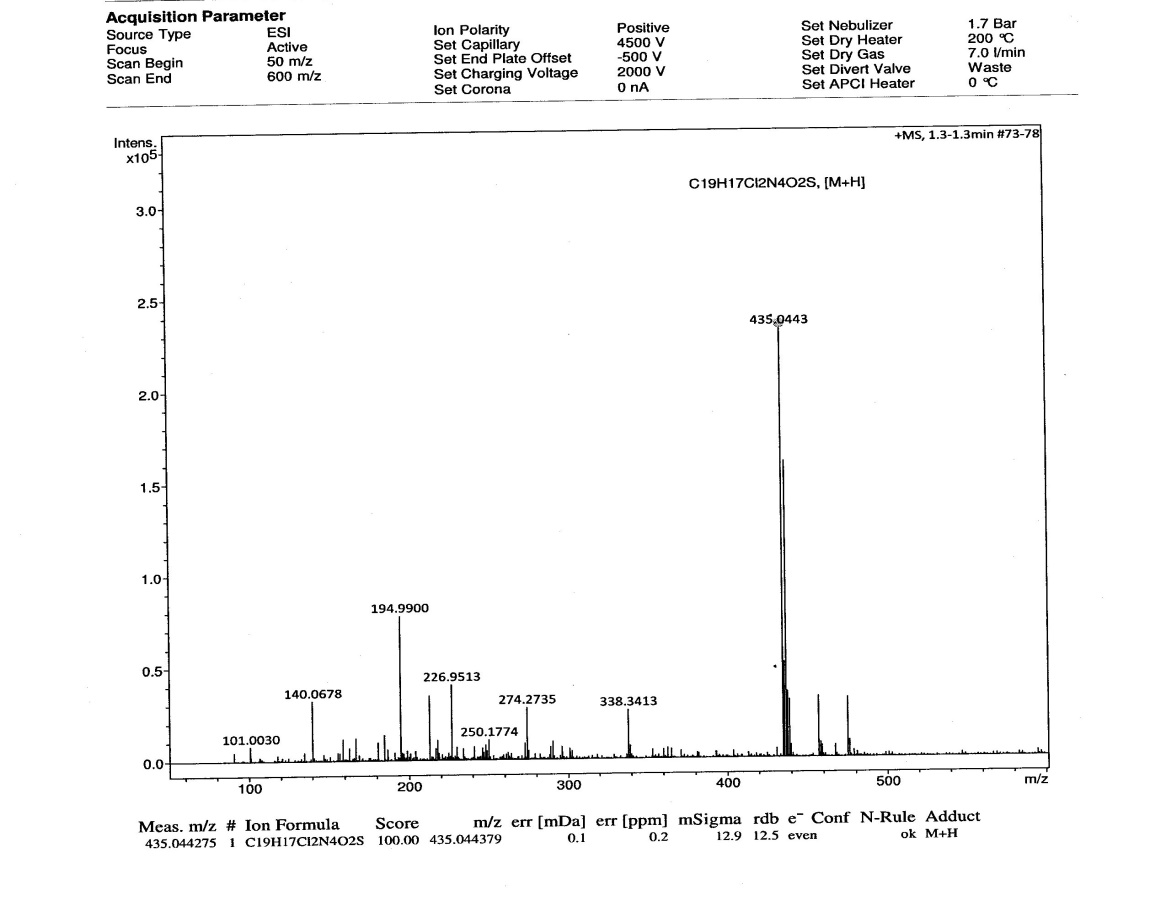
**

**Figure S10**.HRMS spectrum of compound **6a**

**Figure S11**. IR spectrum of compound **6b**

**Figure S12**.1H NMR spectrum of compound **6b**

**

**

**Figure S13**.13C NMR spectrum of compound **6b**

**

**

**Figure S14**.DEPT spectrum of compound **6b**

**
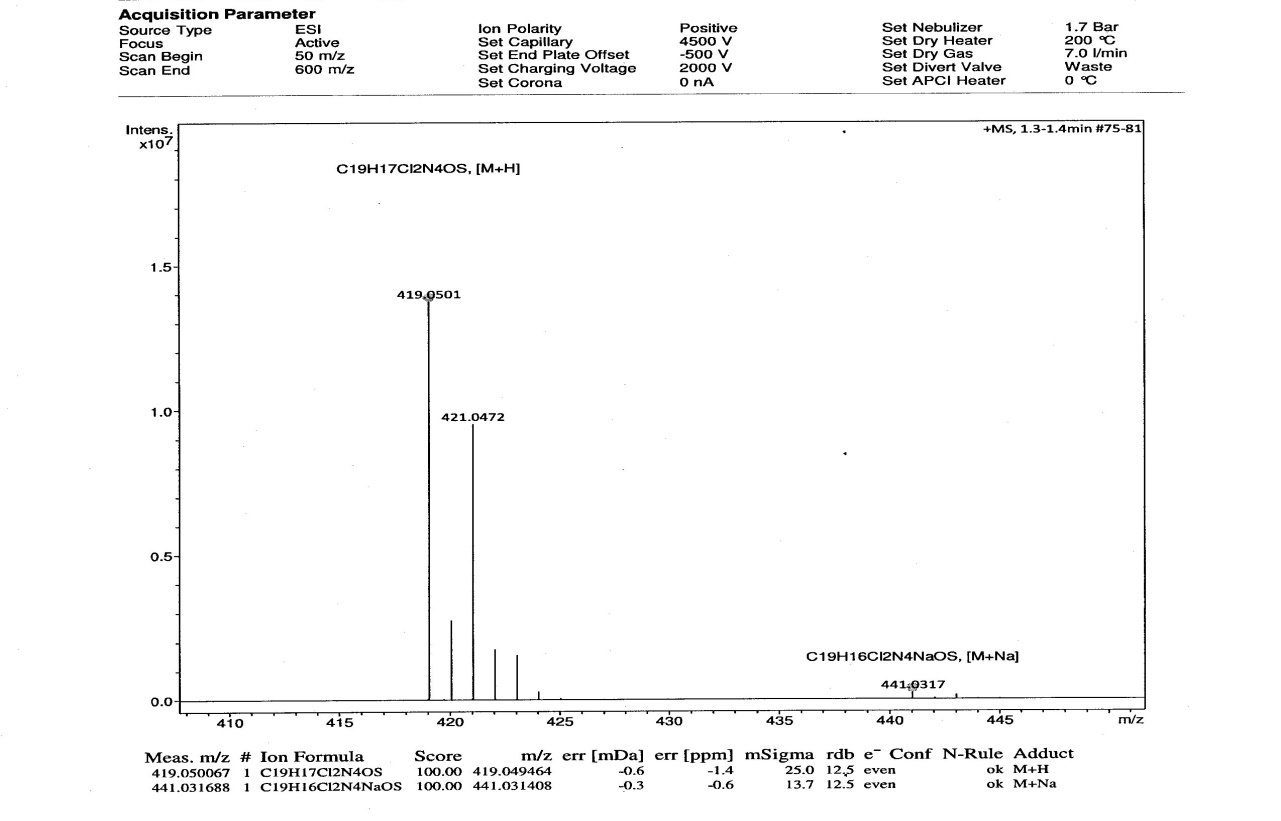
**

**Figure S15**.HRMS spectrum of compound **6b**

**Figure S16**. IR spectrum of compound **6c**

**Figure S17**.1H NMR spectrum of compound **6c**

**
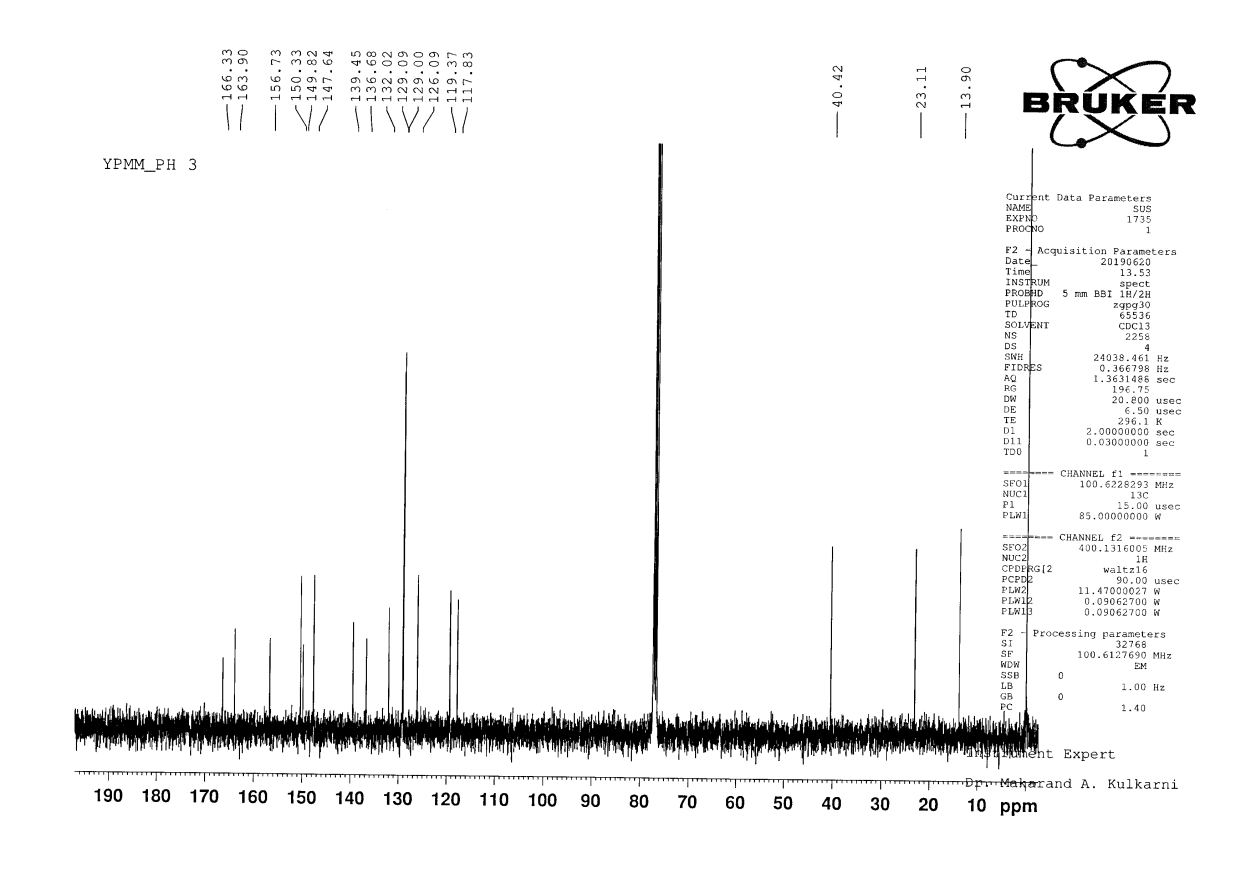
**

**Figure S18**.13C NMR spectrum of compound **6c**

**
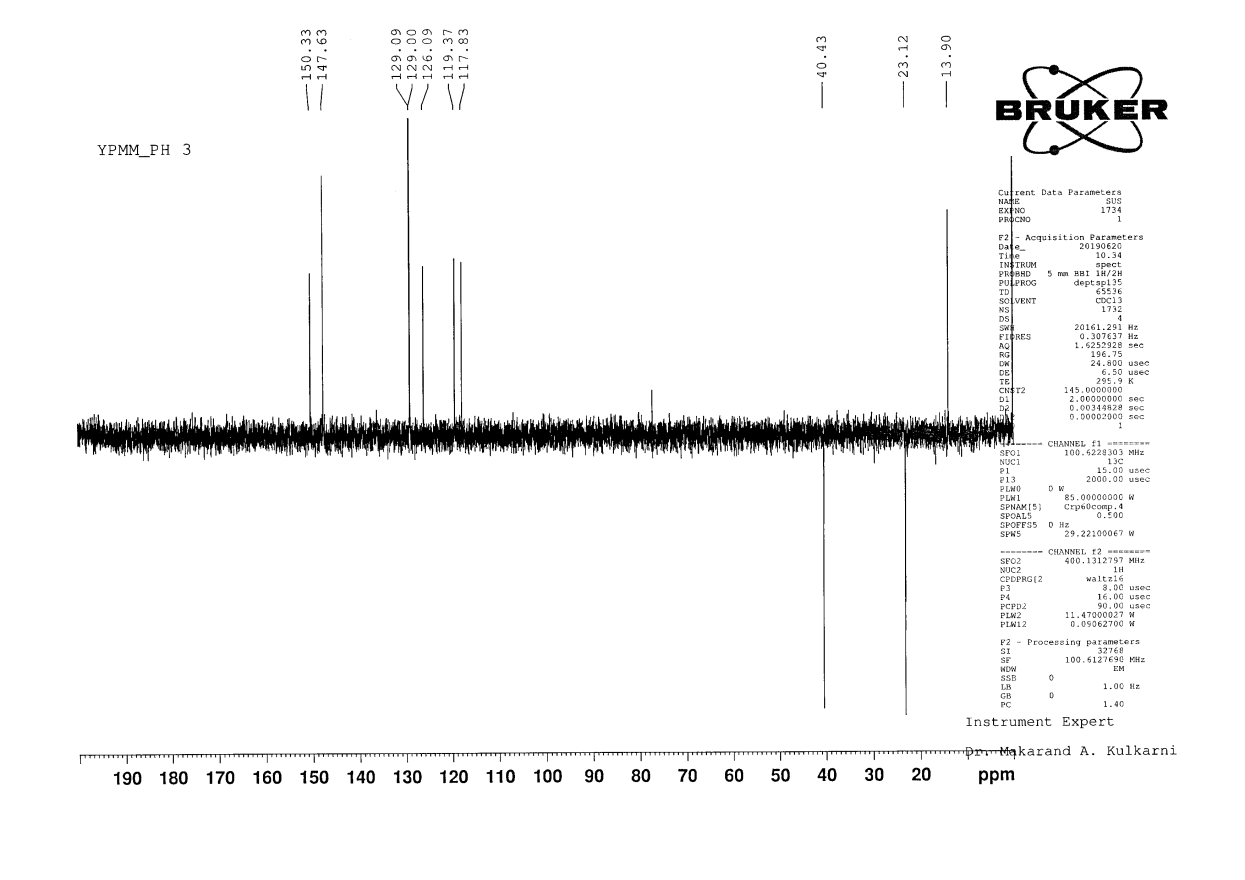
**

**Figure S19**.DEPT spectrum of compound **6c**

**
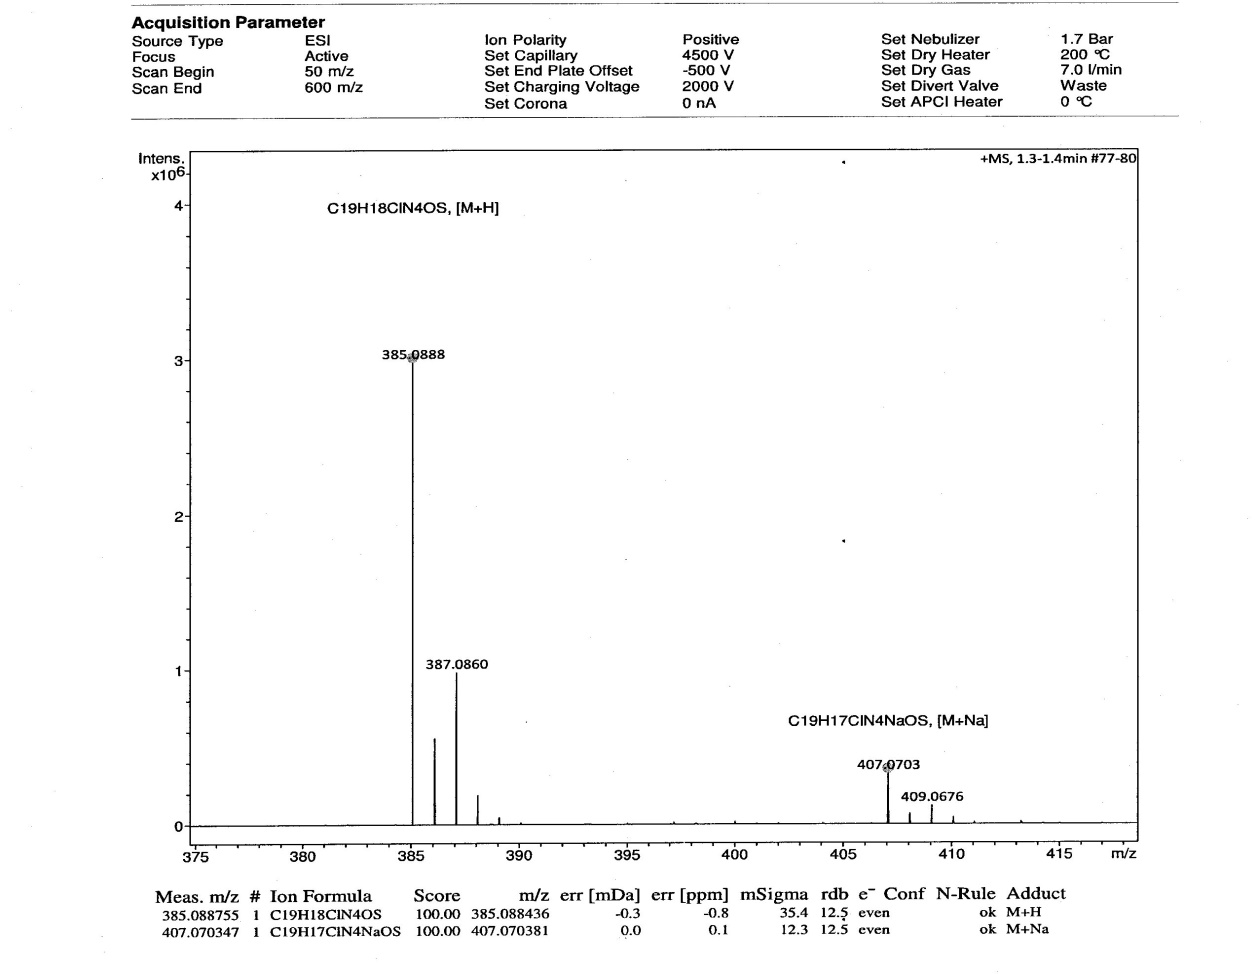
**

**Figure S20**.HRMS spectrum of compound **6c**

**Figure S21**.1H NMR spectrum of compound **6d**

**
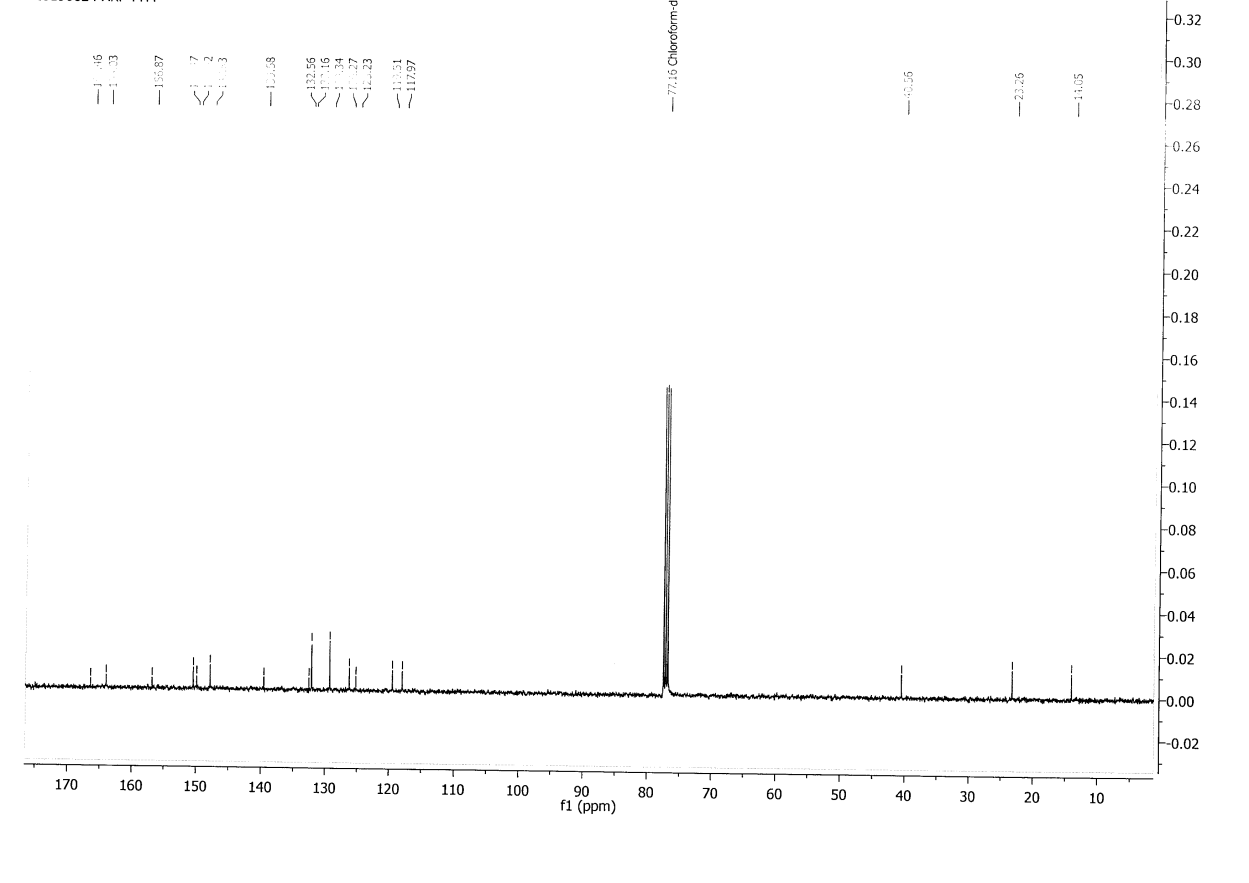
**

**Figure S22**.13C NMR spectrum of compound **6d**

**
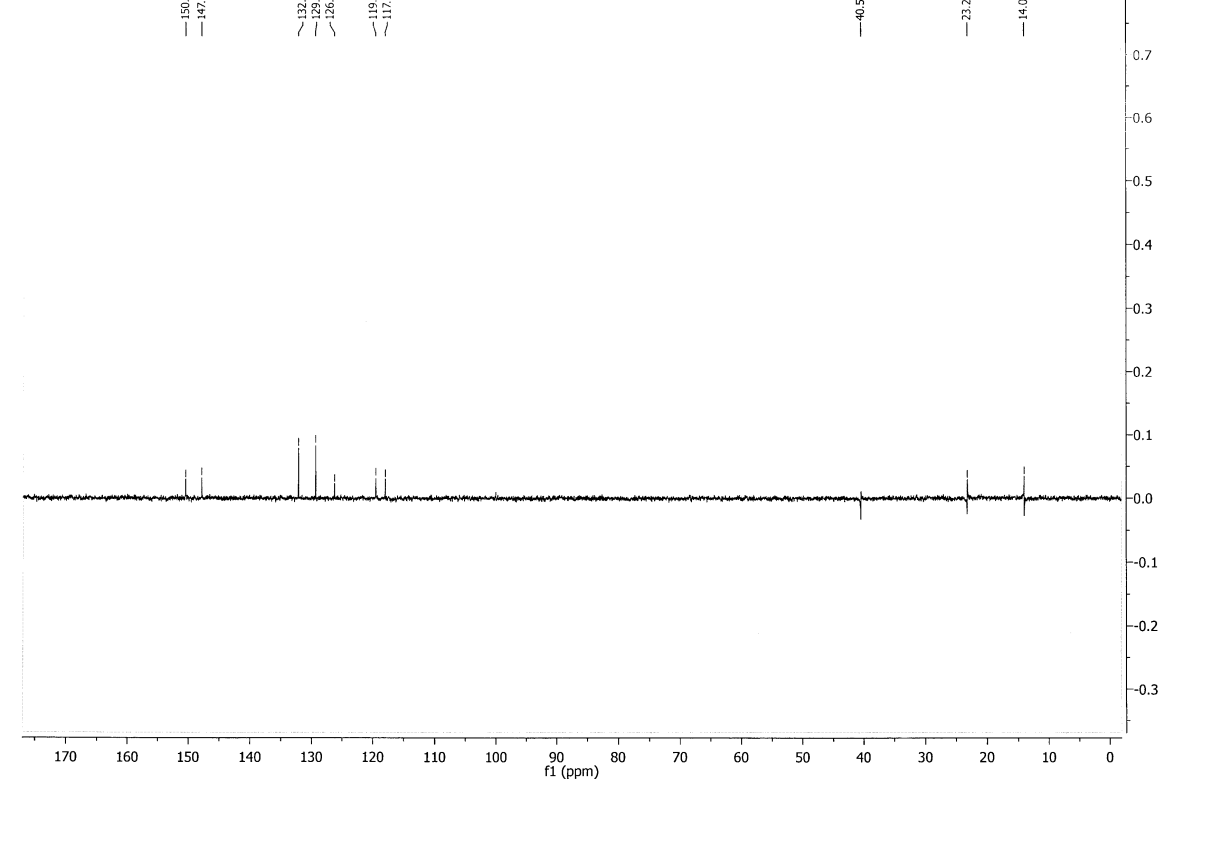
**

**Figure S23**.DEPT spectrum of compound **6d**

**Figure S24**. IR spectrum of compound **6e**

**Figure S25**.1H NMR spectrum of compound **6e**

**
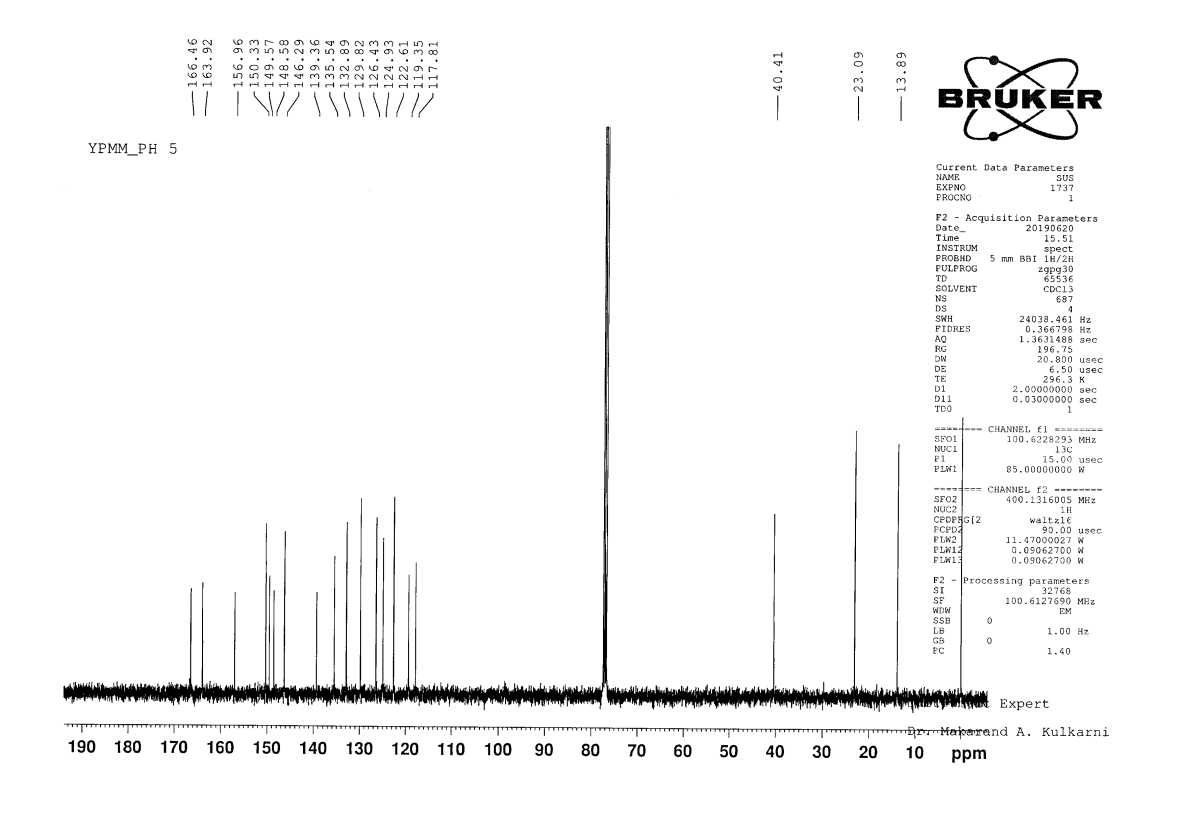
**

**Figure S26**.13C NMR spectrum of compound **6e**

**
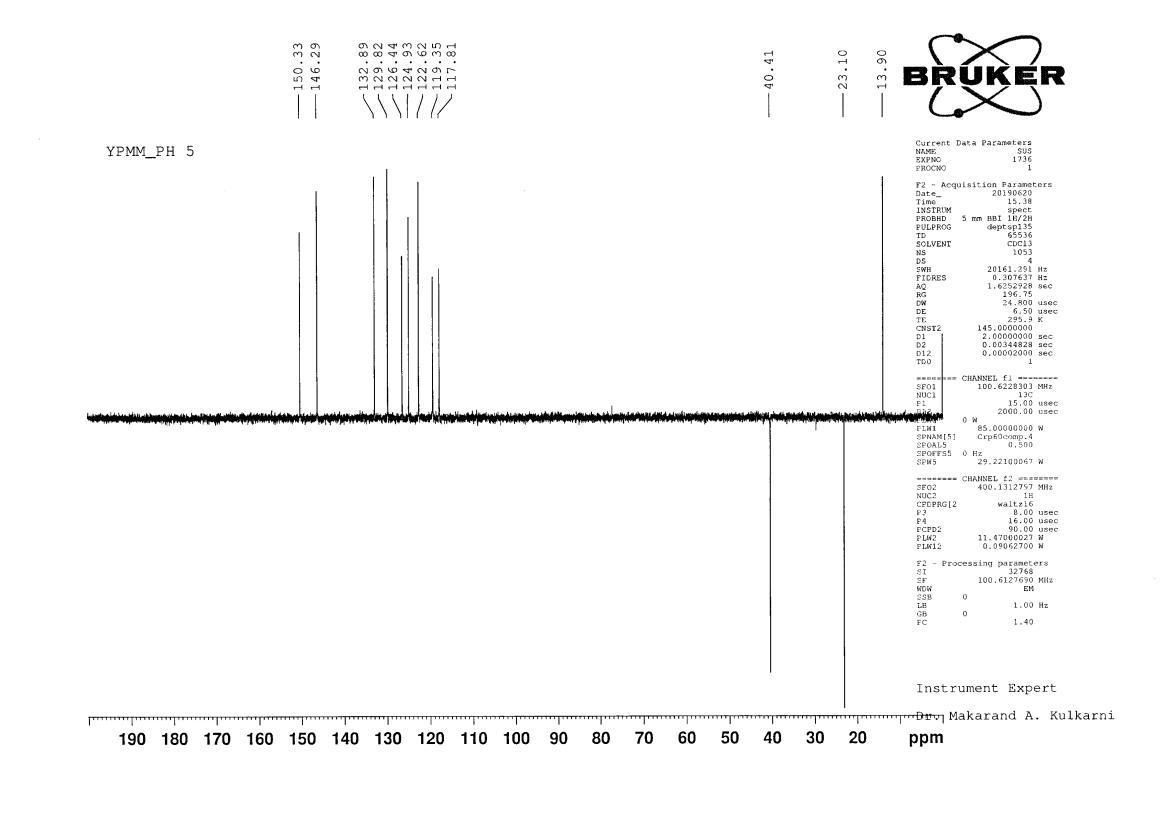
**

**Figure S27**.DEPT spectrum of compound **6e**

**Figure S28**.1H NMR spectrum of compound **6f**

**
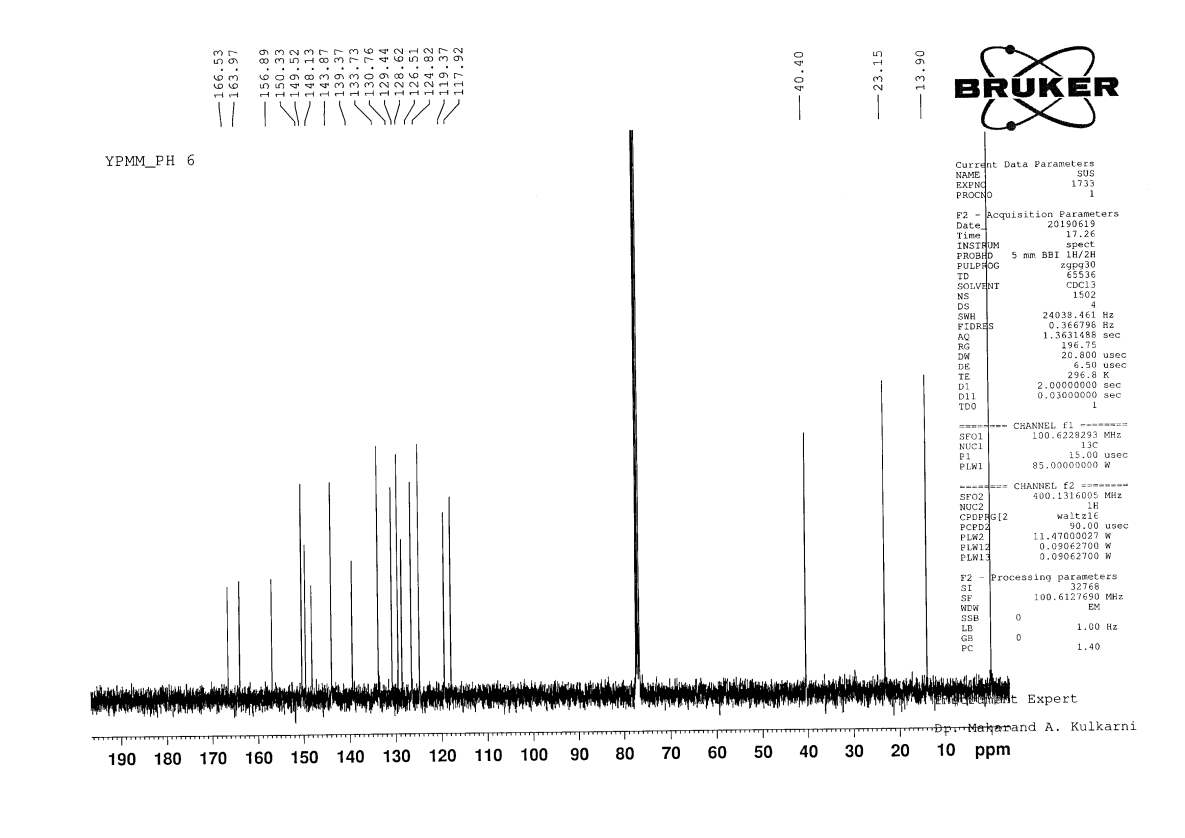
**

**Figure S29**.13C NMR spectrum of compound **6f**

**
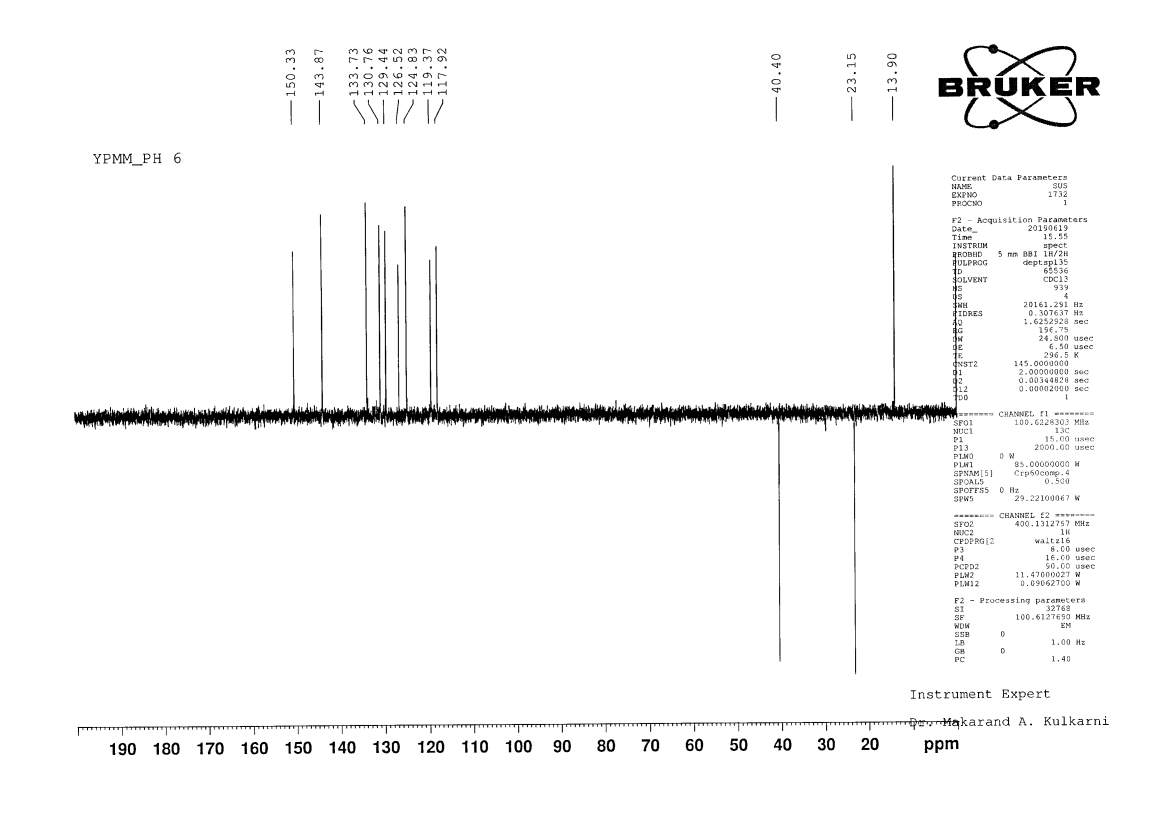
**

**Figure S30**.DEPT spectrum of compound **6f**

**
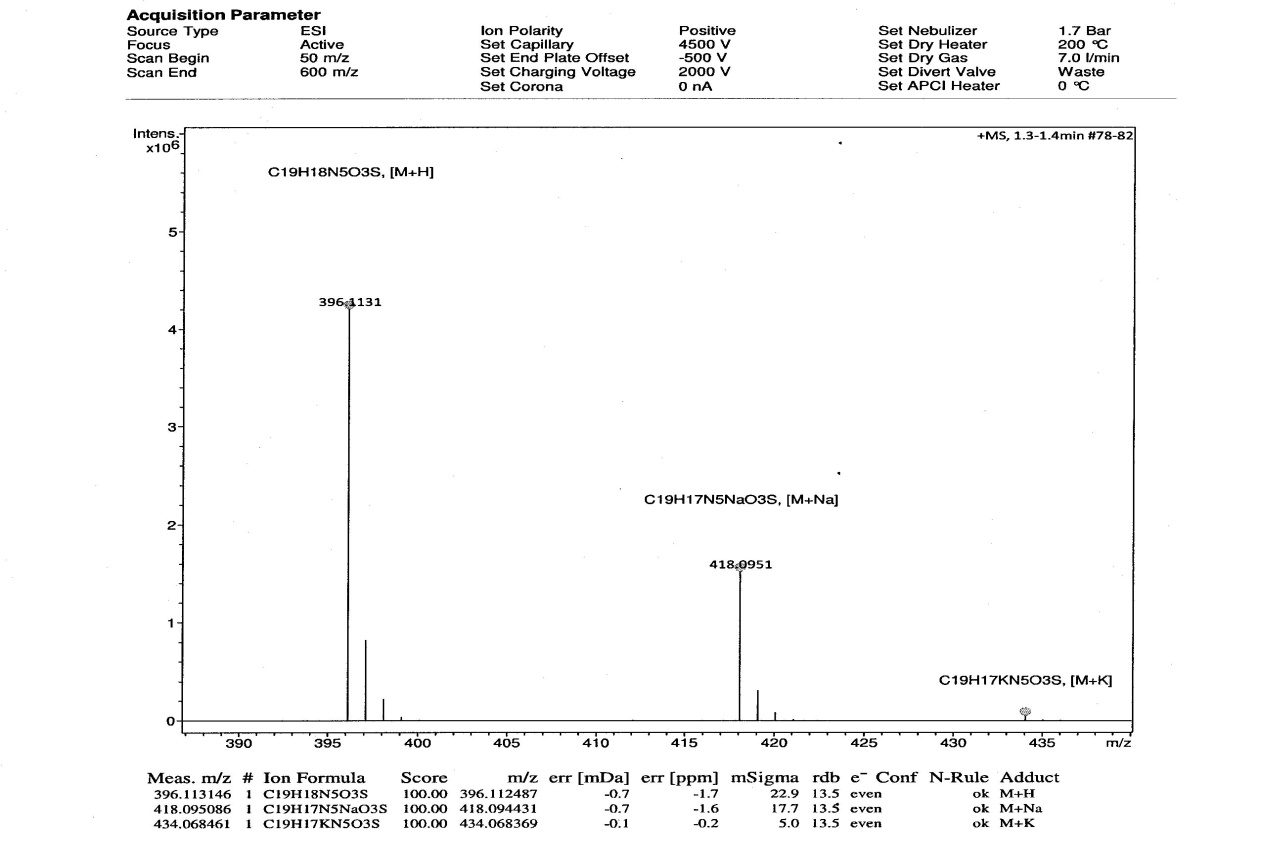
**

**Figure S31**.HRMS spectrum of compound **6f**

**Figure S32**.1H NMR spectrum of compound **6g**

**

**

**Figure S33**.13C NMR spectrum of compound **6g**

**

**

**Figure S34**.DEPT spectrum of compound **6g**

**Figure S35**.1H NMR spectrum of compound **6h**

**
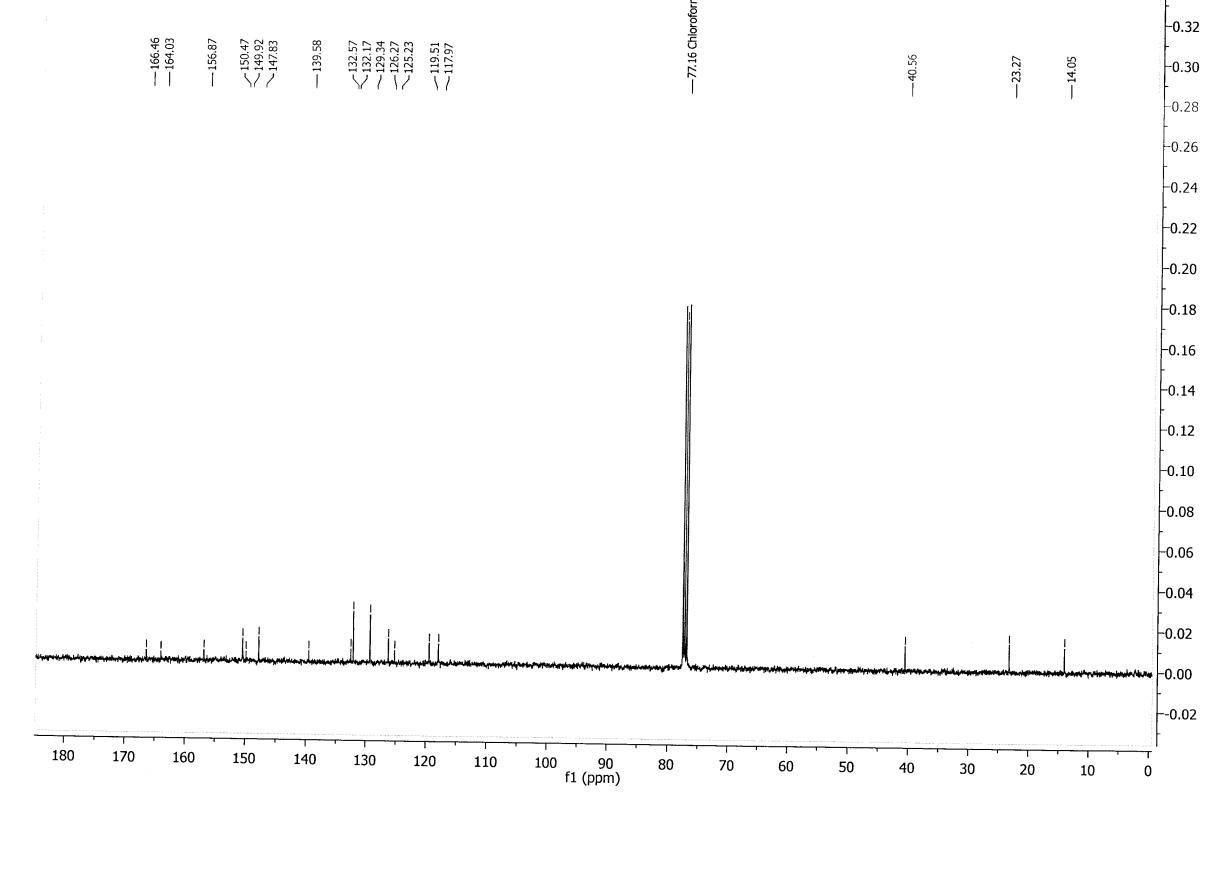
**

**Figure S36**.13C NMR spectrum of compound **6h**

**
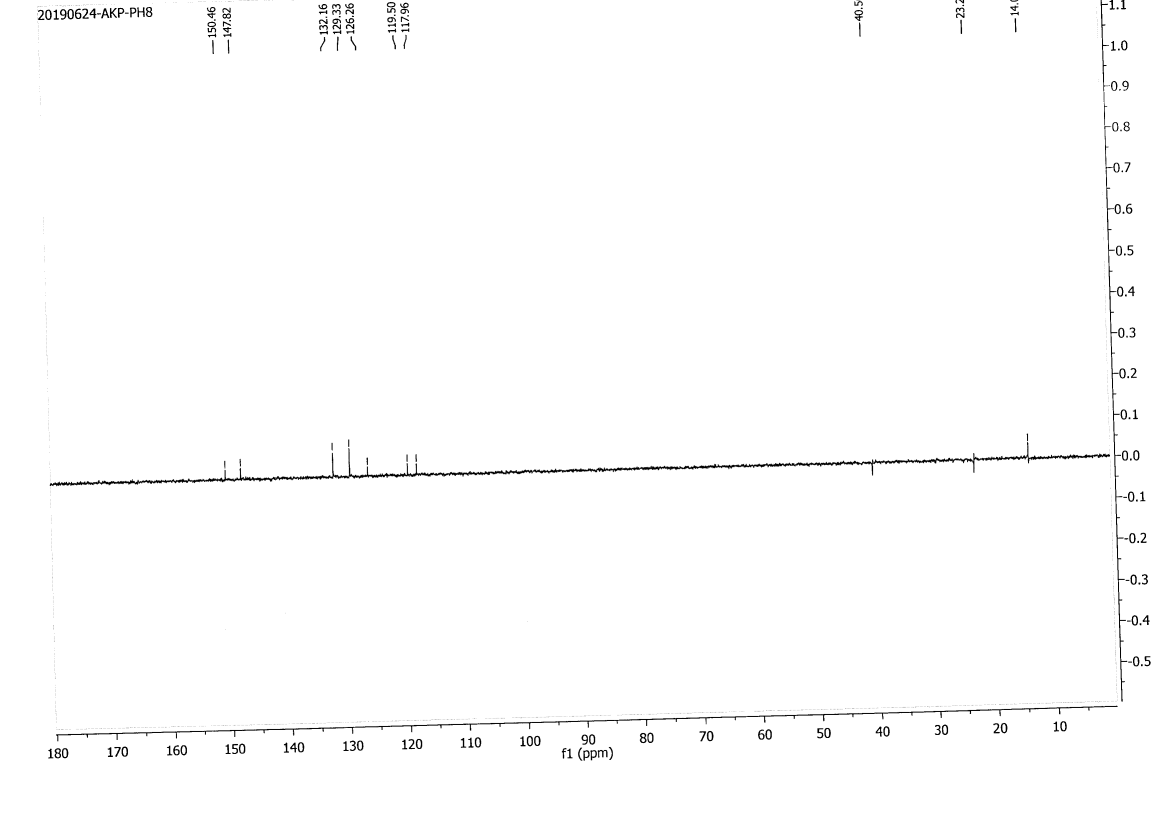
**

**Figure S37**.DEPT spectrum of compound **6h**

**
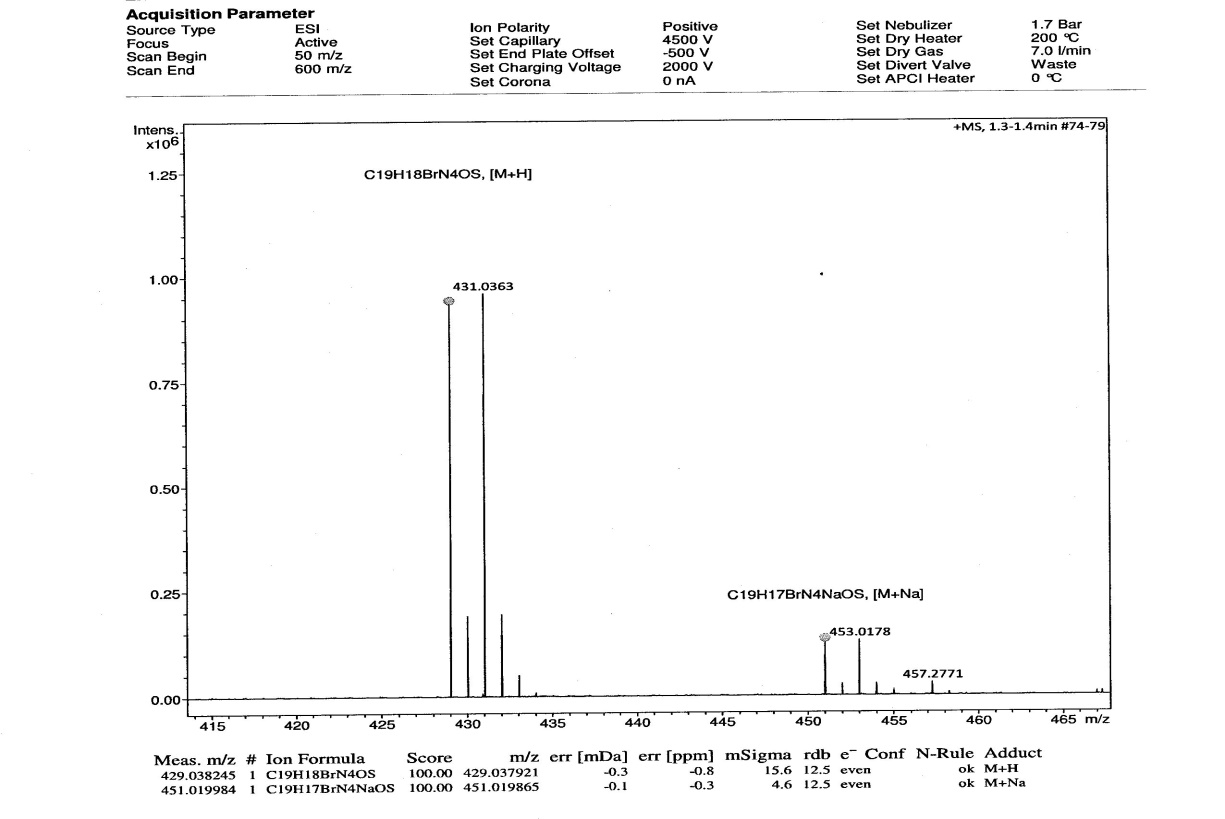
**

**Figure S38**.HRMS spectrum of compound **6h**

**Figure S39**.1H NMR spectrum of compound **6i**

**
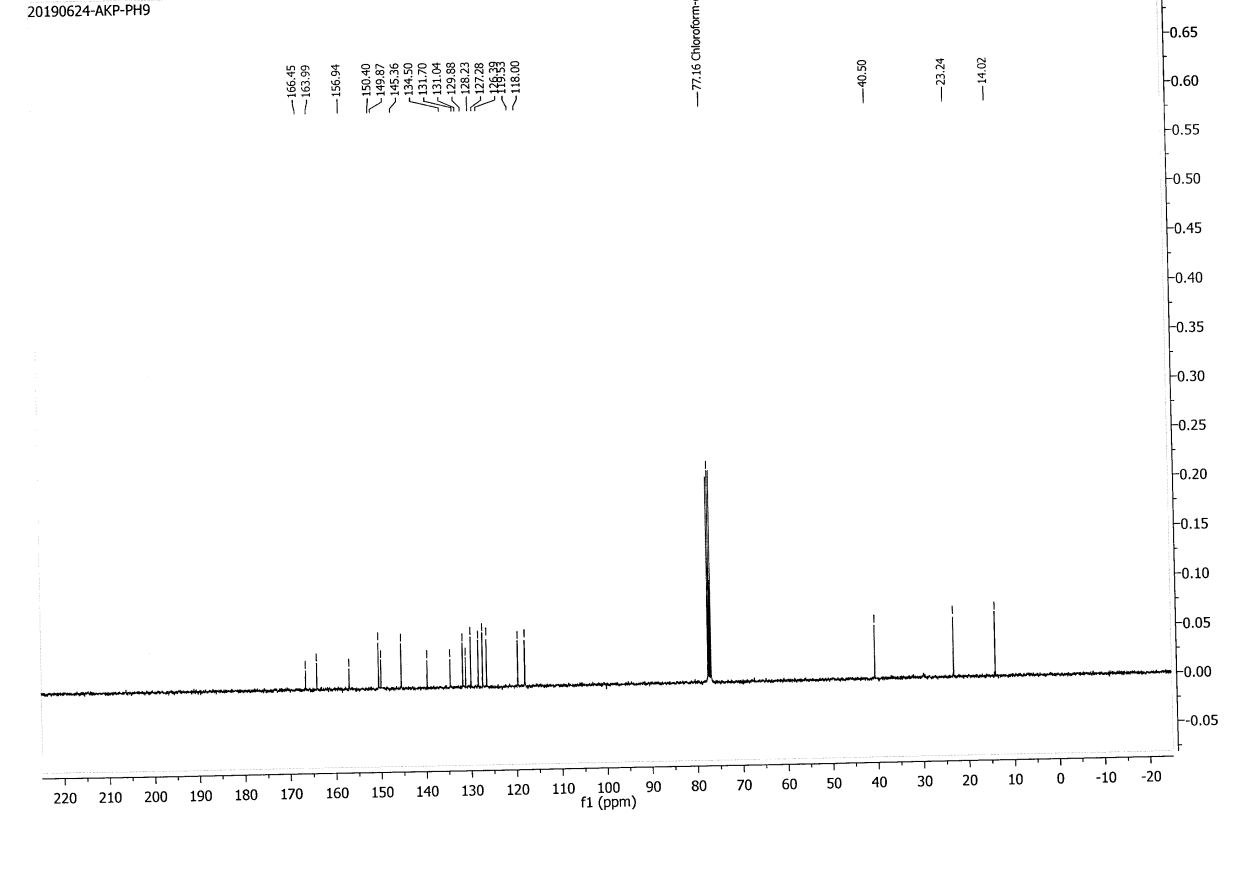
**

**Figure S40**.13C NMR spectrum of compound **6i**

**
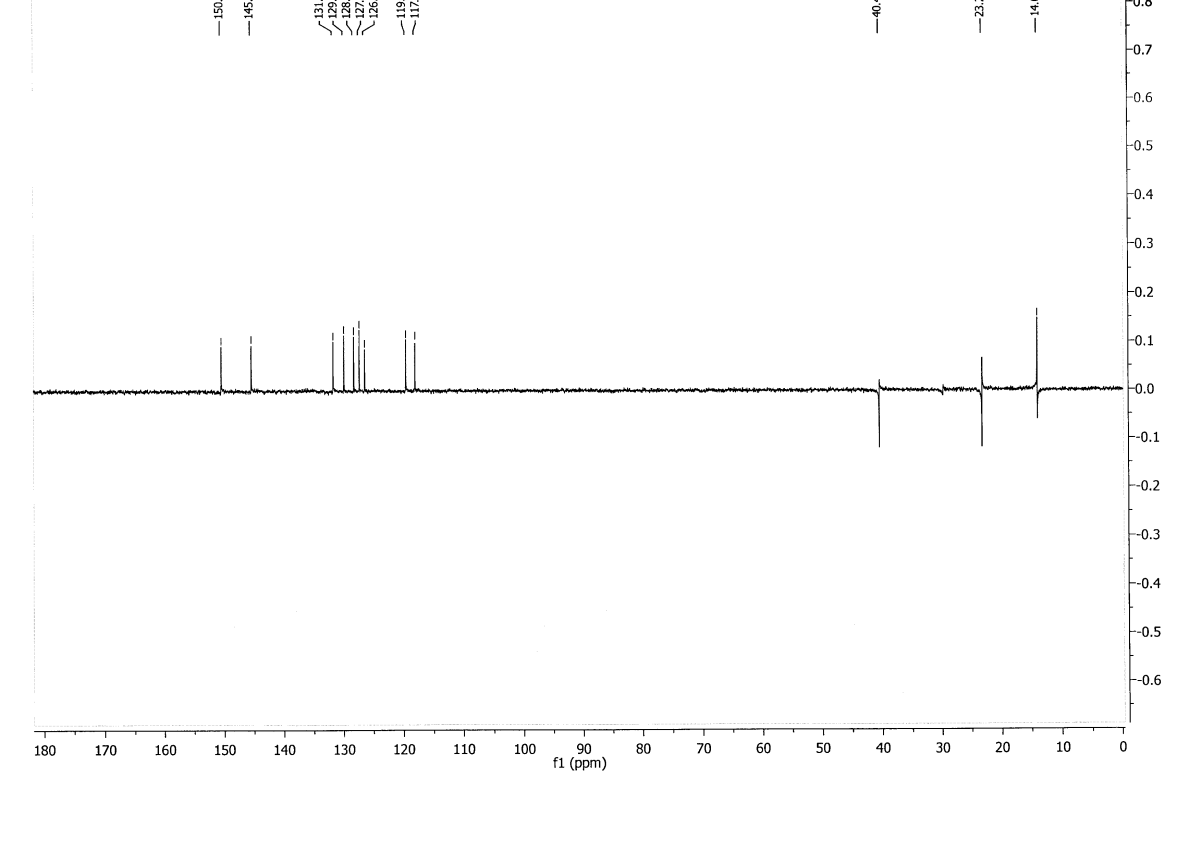
**

**Figure S41**.DEPT spectrum of compound **6i**

**Figure S42**.1H NMR spectrum of compound **6j**

**

**

**Figure S43**.13C NMR spectrum of compound **6j**

**

**

**Figure S44**.DEPT spectrum of compound **6j**

**Figure S45**.IR spectrum of compound **6k**

**Figure S46**.1H NMR spectrum of compound **6k**

**
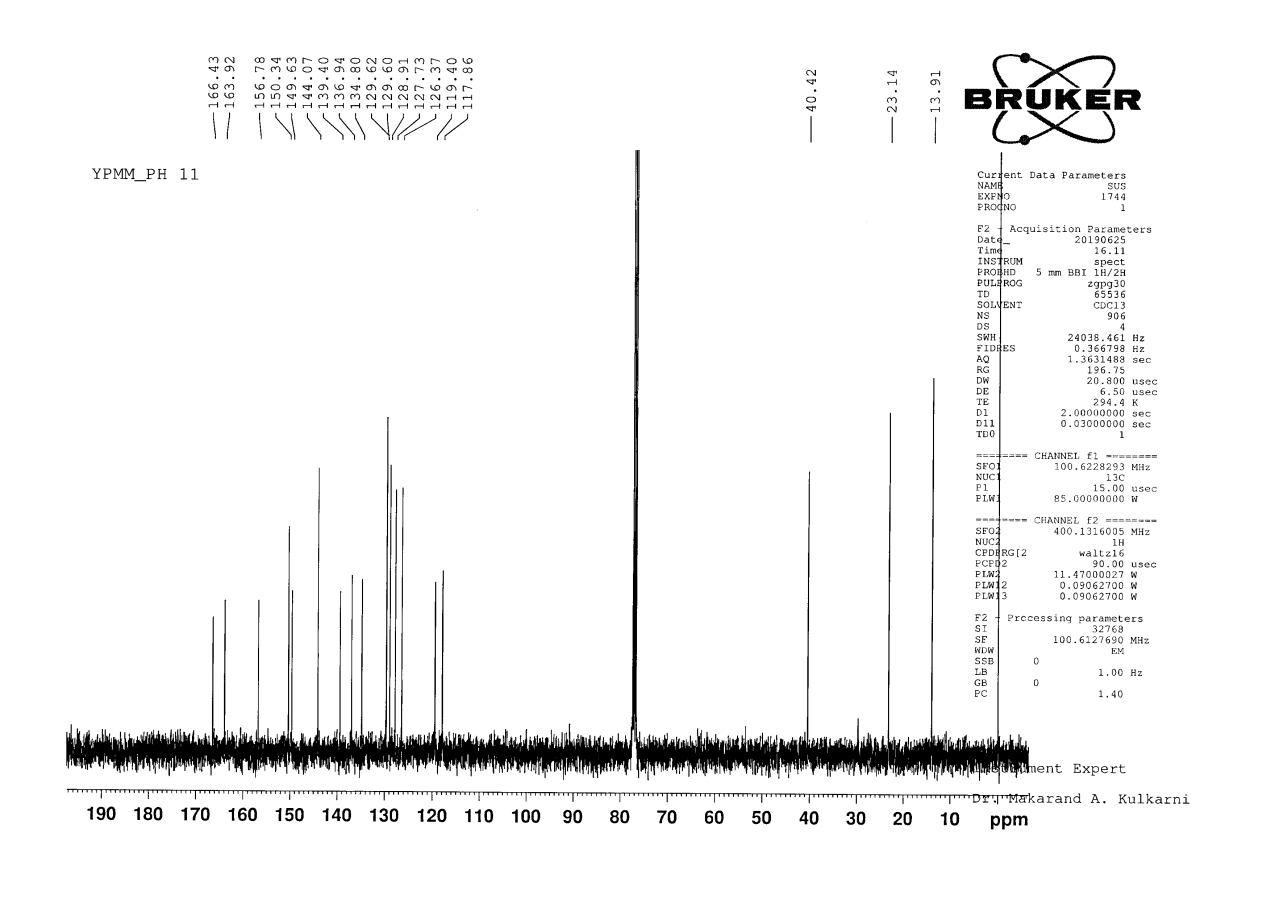
**

**Figure S47**.13C NMR spectrum of compound **6k**

**
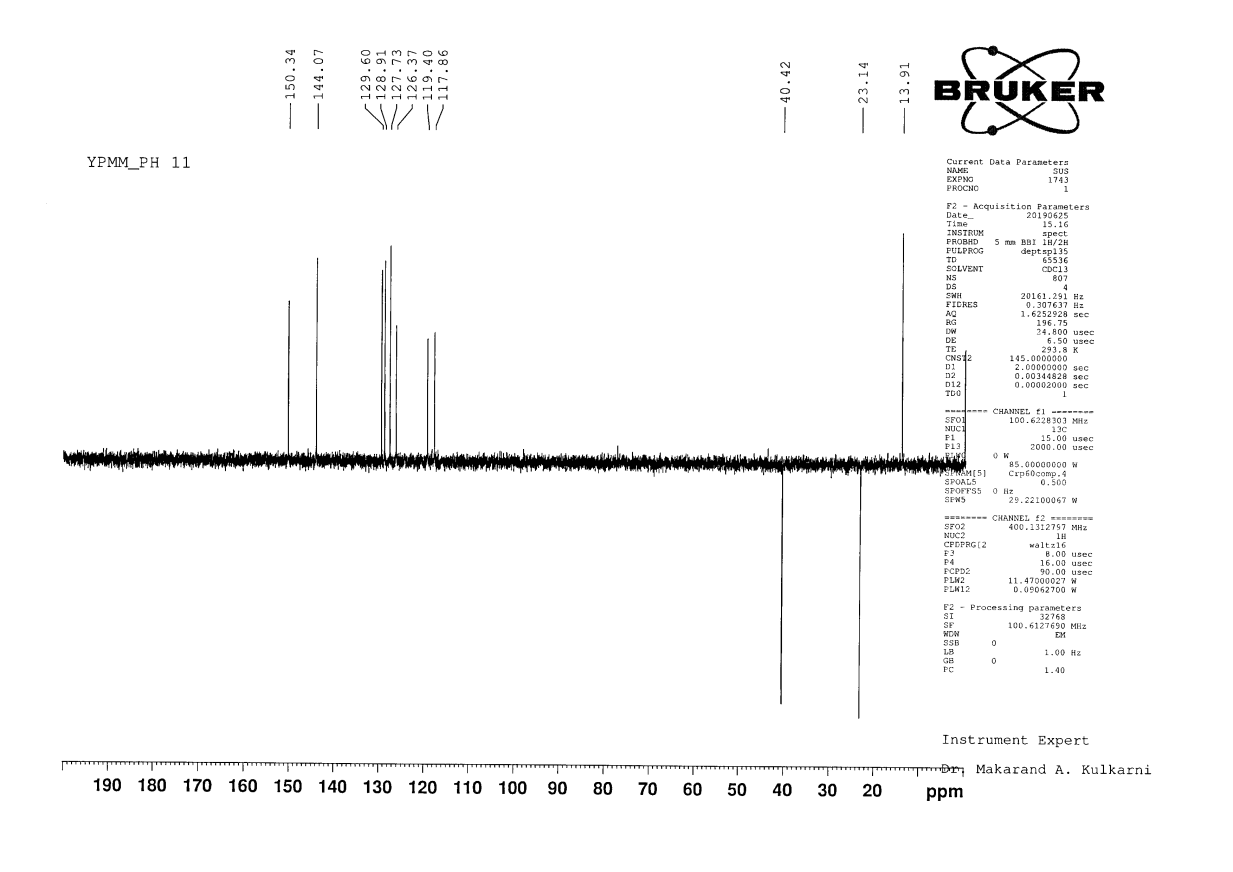
**

**Figure S48**.DEPT spectrum of compound **6k**

**
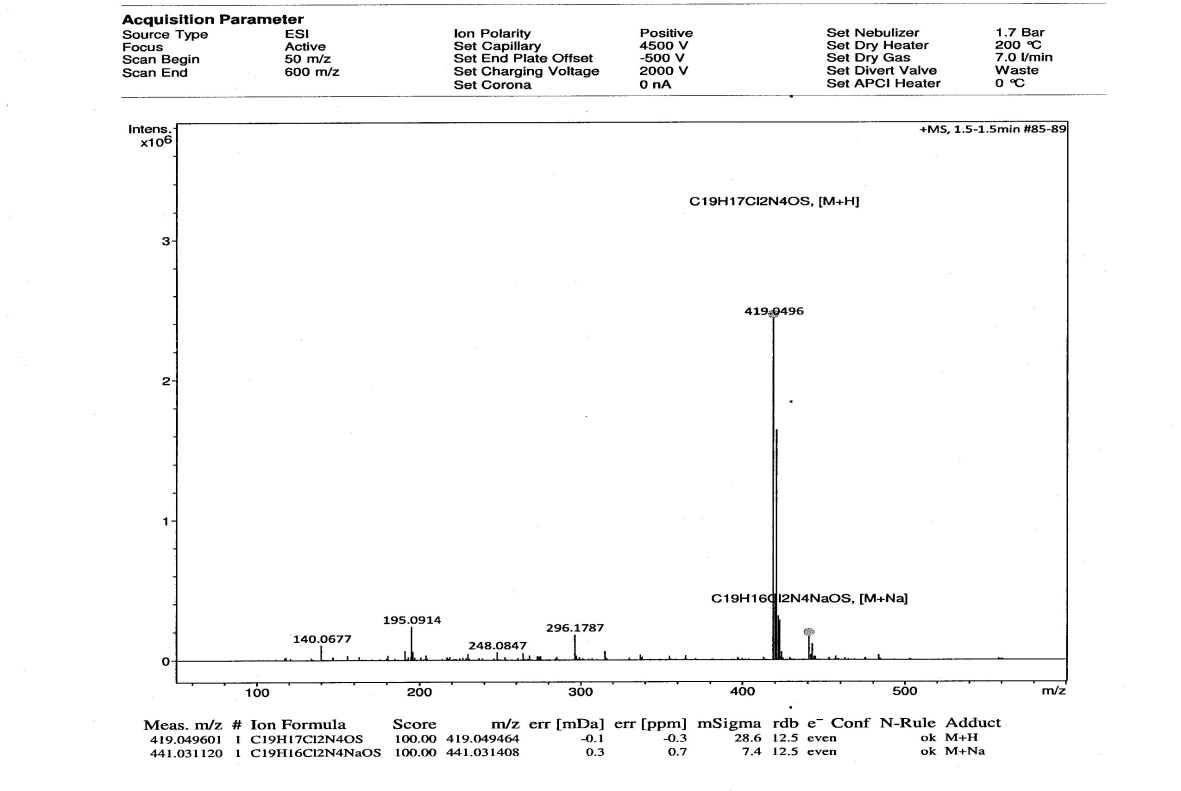
**

**Figure S49**.HRMS spectrum of compound **6k**

**
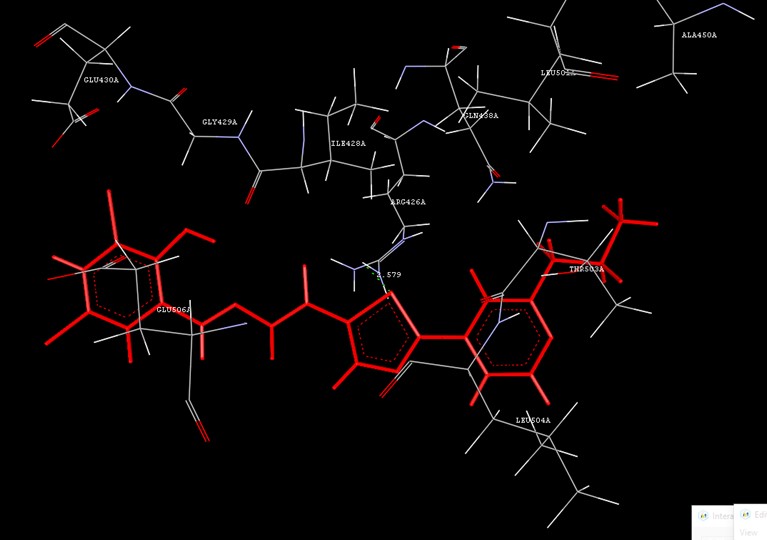
**

**Figure S50.** Docking interactions of compound **6a**

**
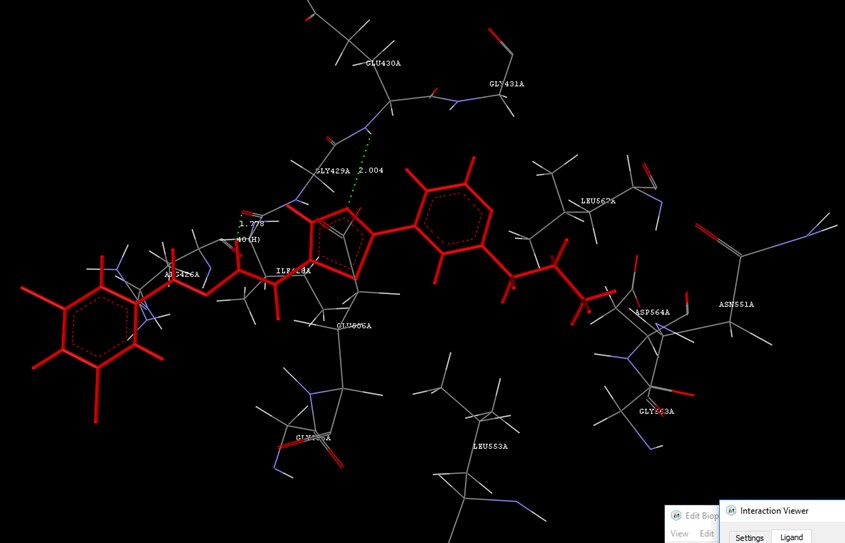
**

**Figure S51.** Docking interactions of compound **6b**

**
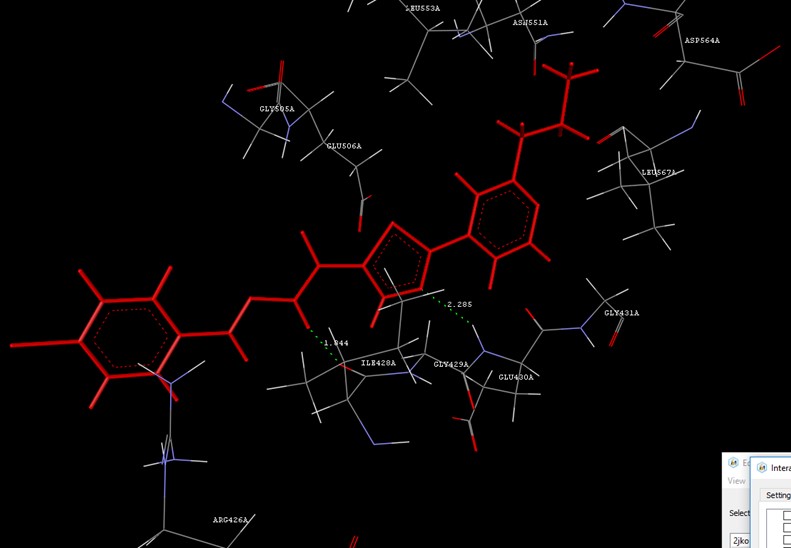
**

**Figure S52.** Docking interactions of compound **6c**

**
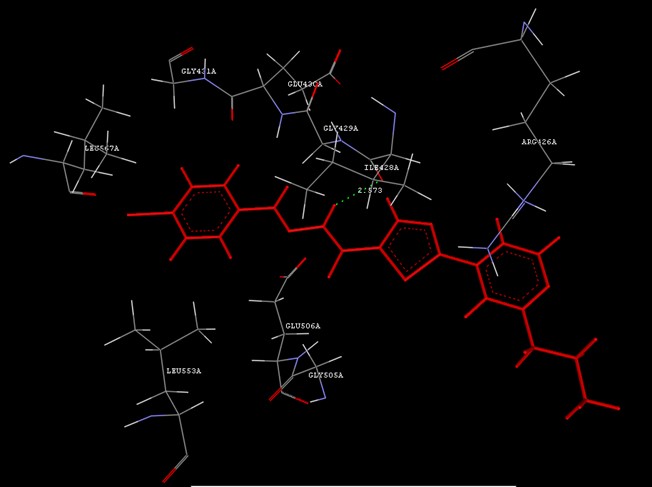
**

**Figure S53.** Docking interactions of compound **6d**

**
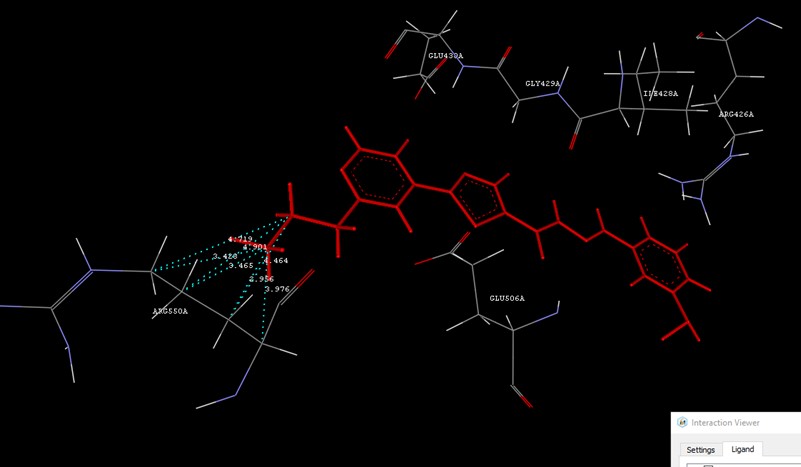
**

**Figure S54.** Docking interactions of compound **6e**

**
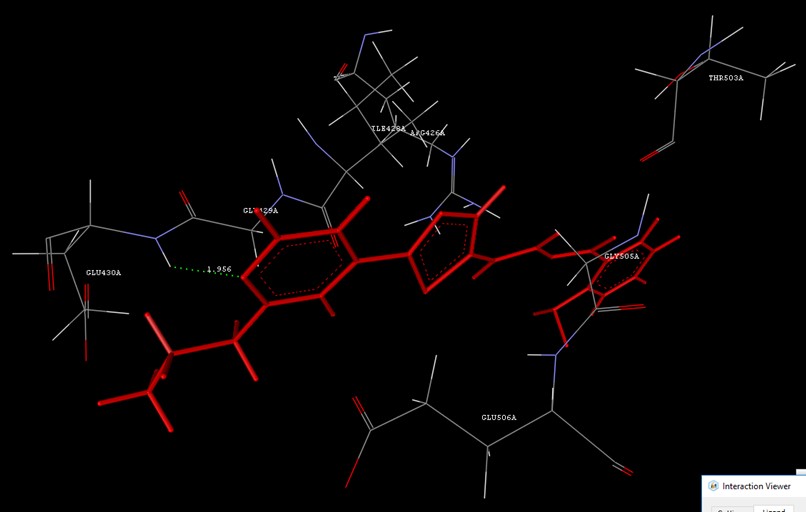
**

**Figure S55.** Docking interactions of compound **6f**

**
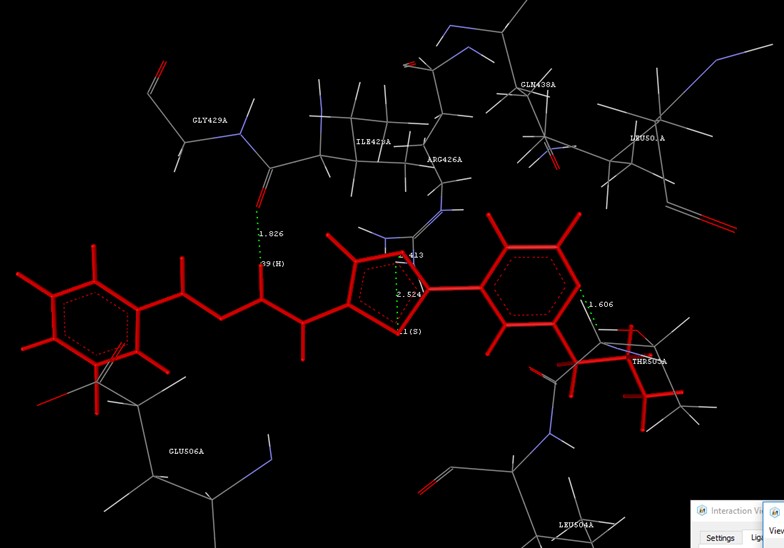
**

**Figure S56.** Docking interactions of compound **6g**

**
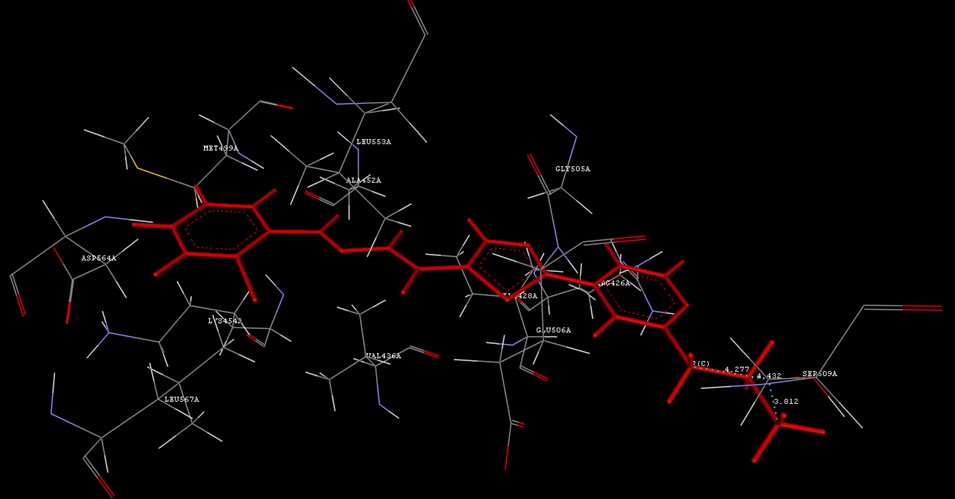
**

**Figure S57.** Docking interactions of compound **6h**

**
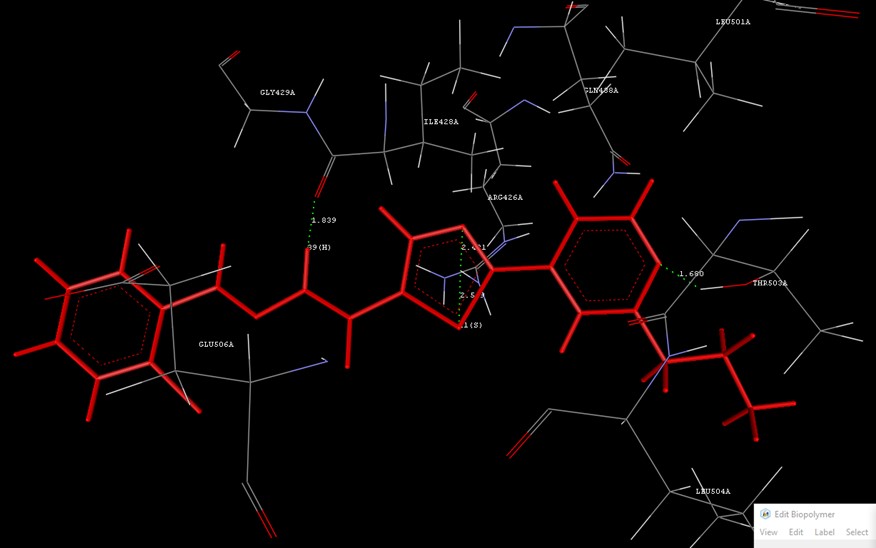
**

**Figure S58.** Docking interactions of compound **6i**

**
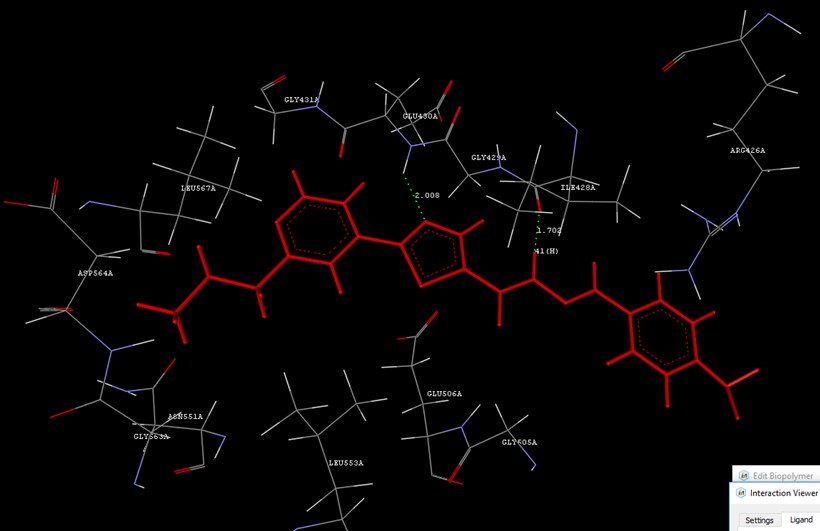
**

**Figure S59.** Docking interactions of compound **6j**

**
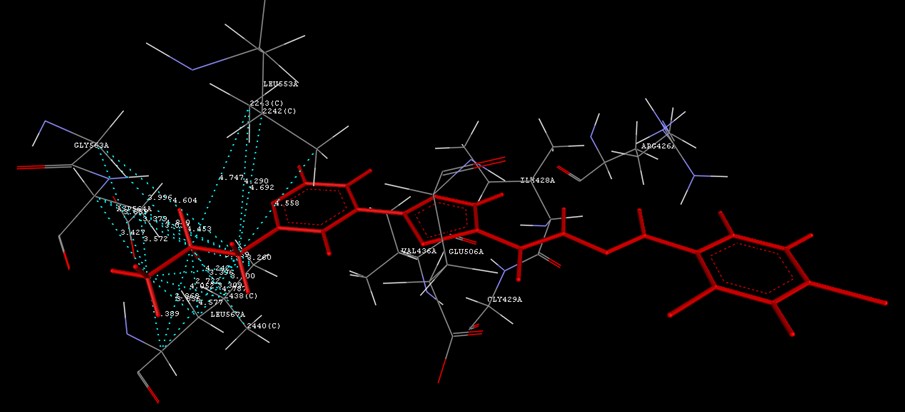
**

**Figure S60.** Docking interactions of compound **6k**
